# Supplementary material
Source: Elsevier journal article supplement (https://rcastoragev2.blob.core.windows.net/91991784dac78c66df5deb9a9eecdcff/mmc1.pdf)
Supplement: mmc1 [file mmc1.pdf]

### Supplementary appendix

This appendix formed part of the original submission and has been peer reviewed.  
We post it as supplied by the authors.

Supplement to: Timonin S, Shartova N, Wen B, et al. The differential effect of ambient temperature on age-specific and sex-specific mortality in 300 largest cities of Russia, 2000–19: a first national time-series study. *Lancet Planet Health* 2025; **9**: e410–20.

## SUPPLEMENTARY MATERIALS

### Differential impact of ambient temperature on age- and sex-specific mortality in 300 largest cities of Russia, 2000-19: a first national time-series study

*Sergey Timonin, Natalia Shartova, Bo Wen, Yao Wu, Evgeny Andreev, Yuming Guo, Joan Ballester*

#### Table of Contents

|                                                                                                                                                                                                                                           |    |
|-------------------------------------------------------------------------------------------------------------------------------------------------------------------------------------------------------------------------------------------|----|
| A. Additional information on data.....                                                                                                                                                                                                    | 4  |
| A.1. Cities and regions under the study.....                                                                                                                                                                                              | 4  |
| Figure S1: Reference map: cities and regions on the map of Russia .....                                                                                                                                                                   | 4  |
| A.2. Mortality data .....                                                                                                                                                                                                                 | 5  |
| Figure S2: Total number of deaths from natural causes, both sexes, all ages, total for 2000-2019. ....                                                                                                                                    | 6  |
| Figure S3a: Standardised mortality ratio (SMR), both sexes, all ages, average for 2009-2011. ....                                                                                                                                         | 7  |
| Figure S3b: Standardised mortality ratio (SMR), males, all ages, average for 2009-2011.....                                                                                                                                               | 7  |
| Figure S3c: Standardised mortality ratio (SMR), females, all ages, average for 2009-2011..                                                                                                                                                | 8  |
| A.3. Temperature data .....                                                                                                                                                                                                               | 9  |
| Figure S4: Mean annual temperature, average for 2000-2019. ....                                                                                                                                                                           | 9  |
| A.4. Geographical distribution of meta-predictors.....                                                                                                                                                                                    | 10 |
| Figure S5: Share of population aged 25+ with tertiary education, both sexes, 2010. ....                                                                                                                                                   | 10 |
| Figure S6: Share of population aged 65 and over, both sexes, 2010.....                                                                                                                                                                    | 11 |
| B. Additional information on modeling .....                                                                                                                                                                                               | 12 |
| <b>Table S1:</b> First-stage sensitivity analysis.....                                                                                                                                                                                    | 12 |
| <b>Table S2:</b> Significance test for predictors (p-value) and I-square statistic in multivariate random-effect meta-regression models .....                                                                                             | 13 |
| B.1. Sensitivity analysis to heat wave 2010 .....                                                                                                                                                                                         | 14 |
| Figure S6: Pooled associations between daily temperature and non-accidental mortality, with and without July and August 2010 in the model .....                                                                                           | 16 |
| Figure S7: Pooled associations between daily temperature and non-accidental mortality in some major cities most affected by the heat wave 2010 (Moscow, Nizhniy Novgorod) and those less affected (St. Petersburg).....                   | 17 |
| Figure S8: Cold (first percentile of temperature) (A) and heat (99th percentile of temperature) relative risks (RRs) (B) in most populated cities (more than 500,000 population), with and without July and August 2010 in the model..... | 18 |

|                                                                                                                                                                                                                                                                                                                                                |                                     |
|------------------------------------------------------------------------------------------------------------------------------------------------------------------------------------------------------------------------------------------------------------------------------------------------------------------------------------------------|-------------------------------------|
| Table S3: Total mortality attributable fractions (AF) of deaths to the heat and cold in cities divided by different regions of Russia, with and without July and August 2010 in the model .....                                                                                                                                                | 19                                  |
| Table S10: Total attributable numbers (AN) of deaths to the heat and cold in cities divided by different regions of Russia, with and without July and August 2010 in the model .....                                                                                                                                                           | 20                                  |
| C. Additional results .....                                                                                                                                                                                                                                                                                                                    | 21                                  |
| C.1. Exposure–response associations .....                                                                                                                                                                                                                                                                                                      | 21                                  |
| Figure S11: Pooled overall cumulative exposure–response relationship predicted for women and men at different ages .....                                                                                                                                                                                                                       | 21                                  |
| Figure S12: Pooled overall cumulative exposure–response relationship predicted for women and men at all ages according to various regions. <i>Note: European part – a, g (north and northwest); b, h, i, j (central), d (south); k – Kaliningrad (exclave between Lithuania and Poland). Ural – l. Siberia – c, e. Far East – f.</i> .....     | 22                                  |
| Figure S13: Pooled overall cumulative exposure–response relationship predicted for women at different age groups according to various regions. <i>Note: European part – a, g (north and northwest); b, h, i, j (central), d (south); k – Kaliningrad (exclave between Lithuania and Poland). Ural – l. Siberia – c, e. Far East – f.</i> ..... | 23                                  |
| Figure S14: Pooled overall cumulative exposure–response relationship predicted for men at different age groups according to various regions. <i>Note: European part – a, g (north and northwest); b, h, i, j (central), d (south); k – Kaliningrad (exclave between Lithuania and Poland). Ural – l. Siberia – c, e. Far East – f.</i> .....   | 24                                  |
| C.2. Minimum Mortality Temperature .....                                                                                                                                                                                                                                                                                                       | 25                                  |
| Figure S15: Percentile of MMT for both sexes at all ages across the 300 major Russian cities, 2000-19 .....                                                                                                                                                                                                                                    | 25                                  |
| C.3. Relative risk ratios .....                                                                                                                                                                                                                                                                                                                | 26                                  |
| Figure S16: Cold-related relative risk ratio (first percentile of temperature distribution), males to females, all ages, 2000-19 .....                                                                                                                                                                                                         | 26                                  |
| Figure S17a: Cold-related relative risk ratio (first percentile of temperature distribution), males to females, 0-59 years, 2000-19. ....                                                                                                                                                                                                      | <b>Error! Bookmark not defined.</b> |
| Figure S17b: Cold-related relative risk ratio (first percentile of temperature distribution), males to females, 60-74 years, 2000-19. ....                                                                                                                                                                                                     | 27                                  |
| Figure S17c: Cold-related relative risk ratio (first percentile of temperature distribution), males to females, over 75 years, 2000-19 .....                                                                                                                                                                                                   | <b>Error! Bookmark not defined.</b> |
| Figure S19: Heat-related relative risk ratio (99th percentile of temperature distribution), males to females, all ages, 2000-19 .....                                                                                                                                                                                                          | 29                                  |
| Figure S20a: Heat-related relative risk ratio (99th percentile of temperature distribution), males to females, 0-59 years, 2000-19. ....                                                                                                                                                                                                       | <b>Error! Bookmark not defined.</b> |
| Figure S20b: Heat-related relative risk ratio (99th percentile of temperature distribution), males to females, 60-74 years, 2000-19. ....                                                                                                                                                                                                      | <b>Error! Bookmark not defined.</b> |
| Figure S20c: Heat-related relative risk ratio (99th percentile of temperature distribution), males to females, over 75 years, 2000-19. ....                                                                                                                                                                                                    | 30                                  |
| Figure S21: Heat-related relative risk ratio (99th percentile of temperature distribution), 75+ to 0-59 years, 2000-19 .....                                                                                                                                                                                                                   | 31                                  |
| Figure S22: Relative risks (RRs) for temperature associated mortality for women and men at all ages across different ages in 300 major Russian cities, 2000-19 .....                                                                                                                                                                           | 32                                  |

|                                                                                                                                                                                                                                                                                                                                                                   |    |
|-------------------------------------------------------------------------------------------------------------------------------------------------------------------------------------------------------------------------------------------------------------------------------------------------------------------------------------------------------------------|----|
| C.4. Relative risks in most populated cities.....                                                                                                                                                                                                                                                                                                                 | 33 |
| Figure S23: Relative risks (RRs) for temperature associated mortality for most populated cities (more than 500,000 population) for men (a) and women (b) at all ages.....                                                                                                                                                                                         | 33 |
| C.5. Attributable fractions and attributable numbers of deaths .....                                                                                                                                                                                                                                                                                              | 34 |
| Table S11: Region-level attributable fractions for cold and heat for the population across different age groups, 2000-19 .....                                                                                                                                                                                                                                    | 34 |
| Table S12: Total mortality attributable fractions (AF) and attributable numbers (AN) of deaths to the heat and cold in 300 major Russian cities stratified by age and sex, 2000-19 .....                                                                                                                                                                          | 36 |
| Table S13: Total mortality attributable fractions (AF) and attributable numbers (AN) of deaths to the heat and cold, including extreme cold and heat, in 300 major Russian cities stratified by regions, 2000-19 .....                                                                                                                                            | 37 |
| Table S14: Temperature-mortality associations according to the heat and cold exposure in most populated cities of the regions in 2000-2019, including minimum mortality temperature (MMT), relative risks (RRs) to cold and heat, attributable fractions (AF) and attributable numbers (AN) of deaths to the heat and cold, including extreme cold and heat ..... | 39 |
| Table S15: Total mortality attributable fractions (AF) and attributable numbers (AN) of deaths to the cold, including extreme cold, in ten cities with the highest values of cold-related RRs (first percentile of temperature), 2000-19 .....                                                                                                                    | 46 |
| Table S16: Total mortality attributable fractions (AF) and attributable numbers (AN) of deaths to the heat, including extreme heat, in ten cities with the highest values of heat-related RRs (99 <sup>th</sup> percentile of temperature), 2000-19 .....                                                                                                         | 47 |

A. Additional information on data

A.1. Cities and regions under the study

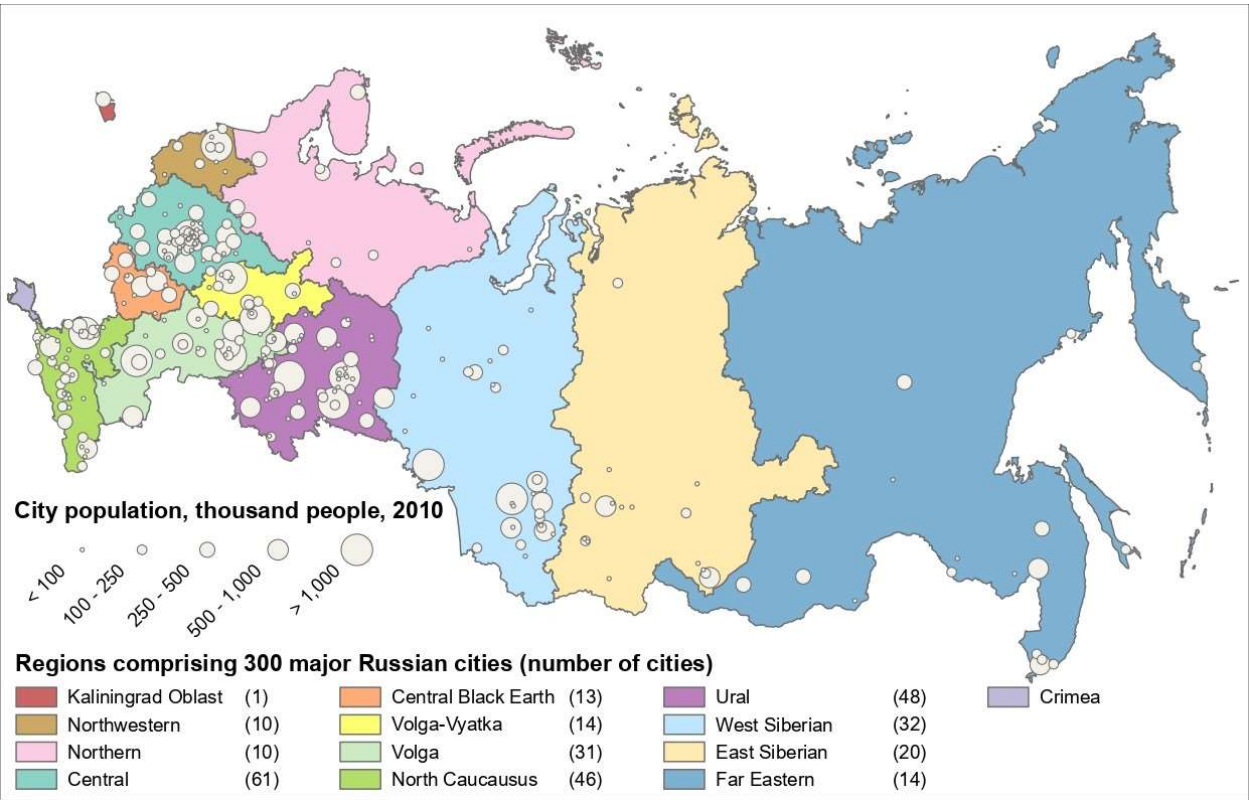

**Figure S1:** Reference map: cities and regions on the map of Russia

*Note:* Here and hereafter the borders of Russia are shown according to the 2019 delineations as defined by the Russian government.

## A.2. Mortality data

### **Collection and processing of mortality data**

We used anonymised individual death records provided by the Russian Federal State Statistics Service (Rosstat) for each calendar year from 2000 to 2020 to create a harmonised dataset covering all deaths in Russia's 300 largest cities between the 1st of January 2000 and 31st of December 2019. We used the detailed information on the Russian Classification of Objects of Administrative Division ("OKATO") and the Russian Classification of Territories of Municipal Formations ("OKTMO") to construct the series of time-consistent death records for the Russian cities with population size more than 50 thousand people. Both "OKATO" and "OKTMO" were included in the death records and referred to the place of residence (as indicated in the passport) of a deceased person. There were several changes in the 'OKATO' and 'OKTMO' classifications during the study period, so we used correspondence tables to account for these changes. The time series of daily deaths for each city were subjected to a robust check. For 22 cities, we were unable to ensure temporal consistency, and they were excluded from further consideration. The final dataset comprised Russia's 300 largest cities.

According to the normative documents, a death in Russia can be registered at the civil registry office located either in the city where the death occurred or in the place of residence. However, Rosstat makes annual adjustments to redistribute (reassign) deaths to the place of residence, when necessary. In addition to the place of residence, death records also contained information on the date of death, age, sex and underlying cause of death according to the International Classification of Diseases, 10th Revision. We only included deaths from natural causes (ICD-10 codes: A00 - P99) in our analysis; external causes of death (injuries and poisonings) were excluded.

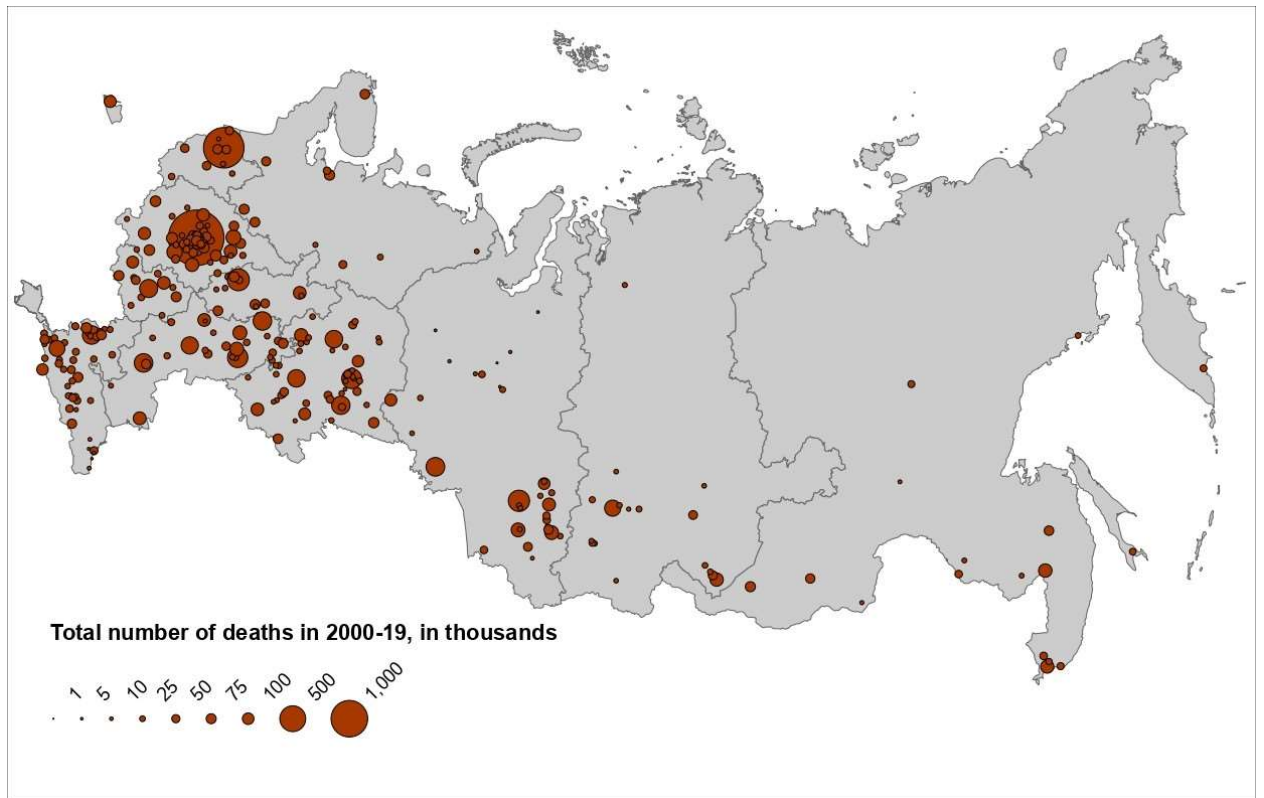

**Figure S2:** Total number of deaths from natural causes, both sexes, all ages, total for 2000-2019.

*Note:* The circles on this map are proportional to the total number of deaths, unlike all other maps where the circles are proportional to the logarithm of the population of the cities in 2010 (according to the census).

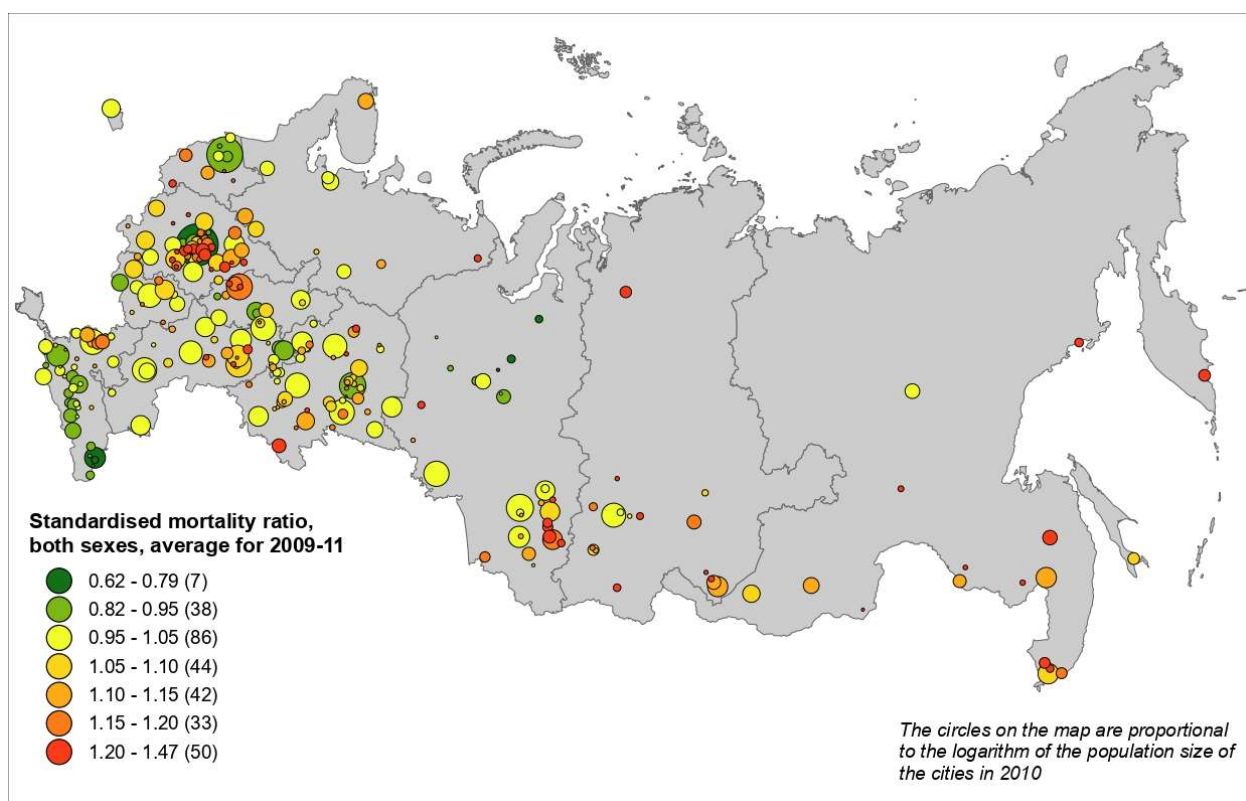

**Figure S3a:** Standardised mortality ratio (SMR), both sexes, all ages, average for 2009-2011.

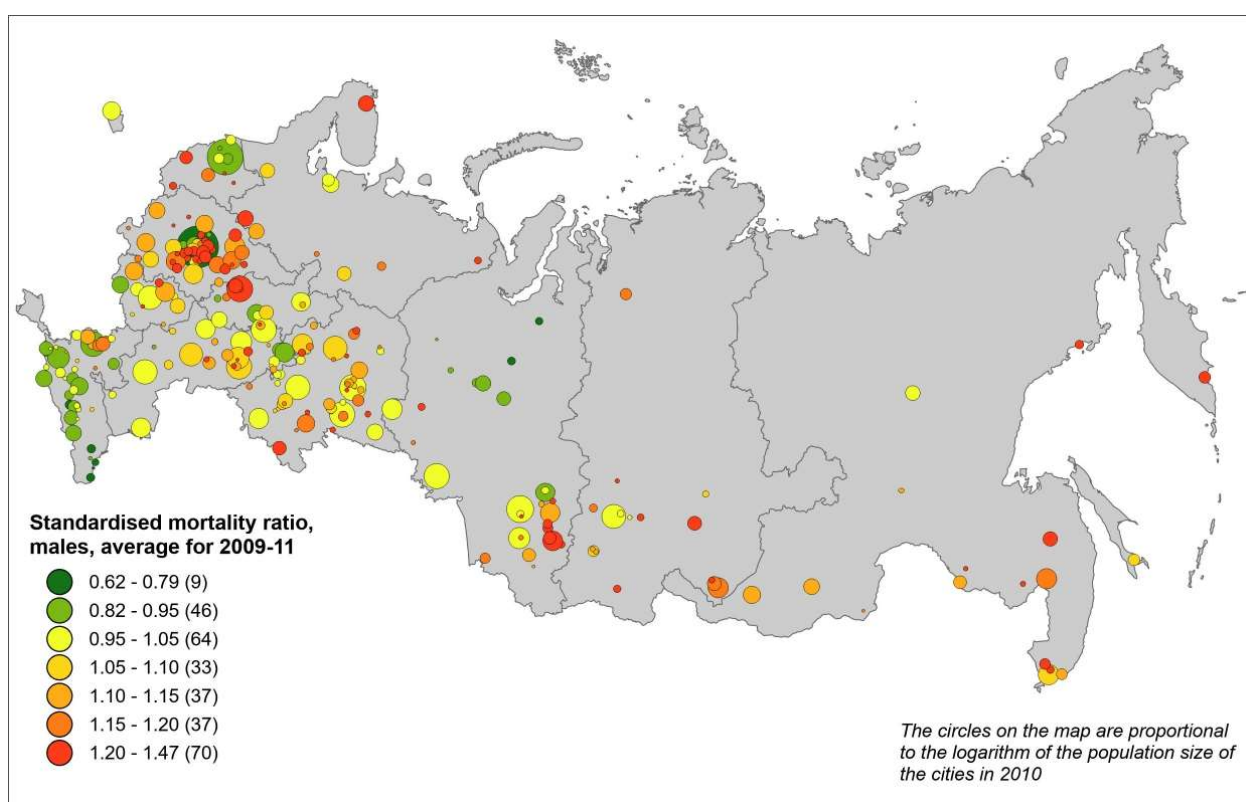

**Figure S3b:** Standardised mortality ratio (SMR), males, all ages, average for 2009-2011.



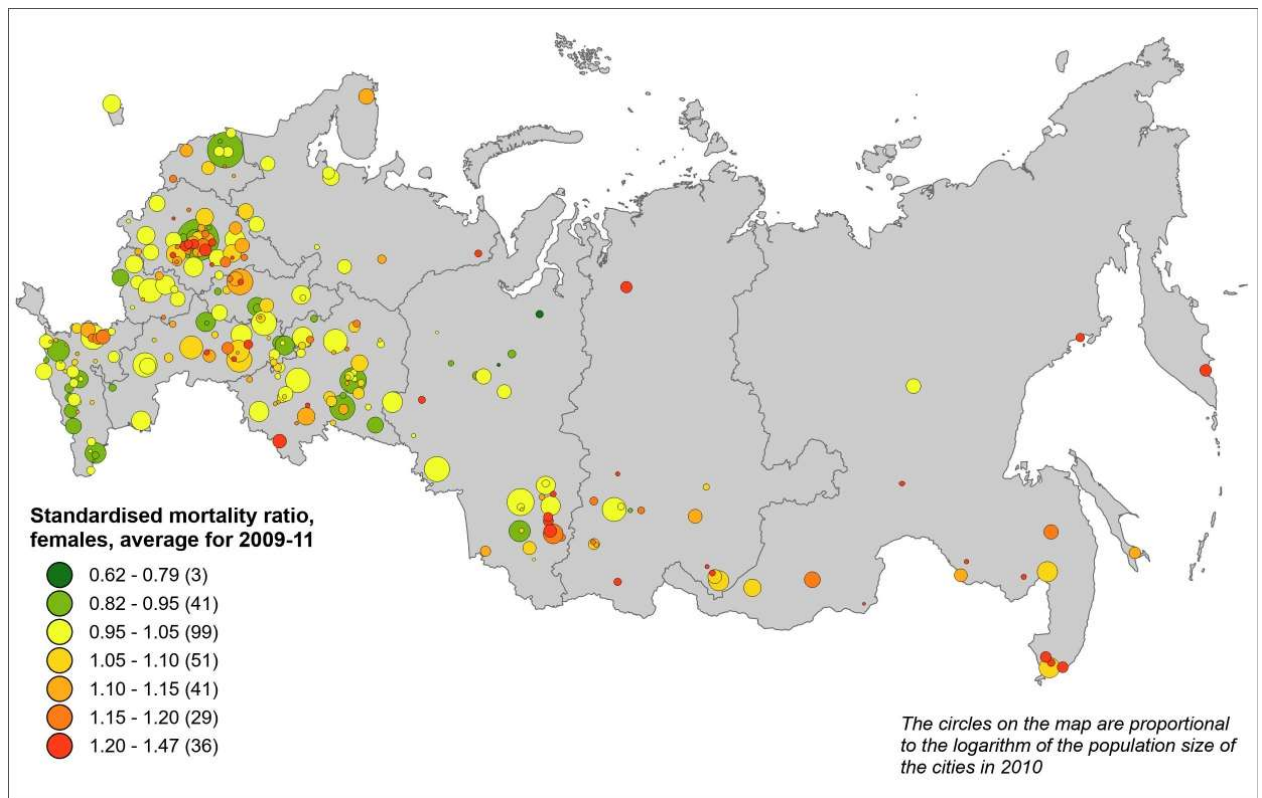

**Figure S3c:** Standardised mortality ratio (SMR), females, all ages, average for 2009-2011.

**Note:** The Standardised Mortality Ratio (SMR) is determined by dividing the observed number of deaths in a city by the expected number of deaths. The expected number of deaths is calculated by multiplying the age distribution of the city's population by the average age-specific death rates across all cities. An SMR greater than 1 indicates higher-than-average mortality, while an SMR less than 1 suggests lower-than-average mortality compared to all cities.

### A.3. Temperature data

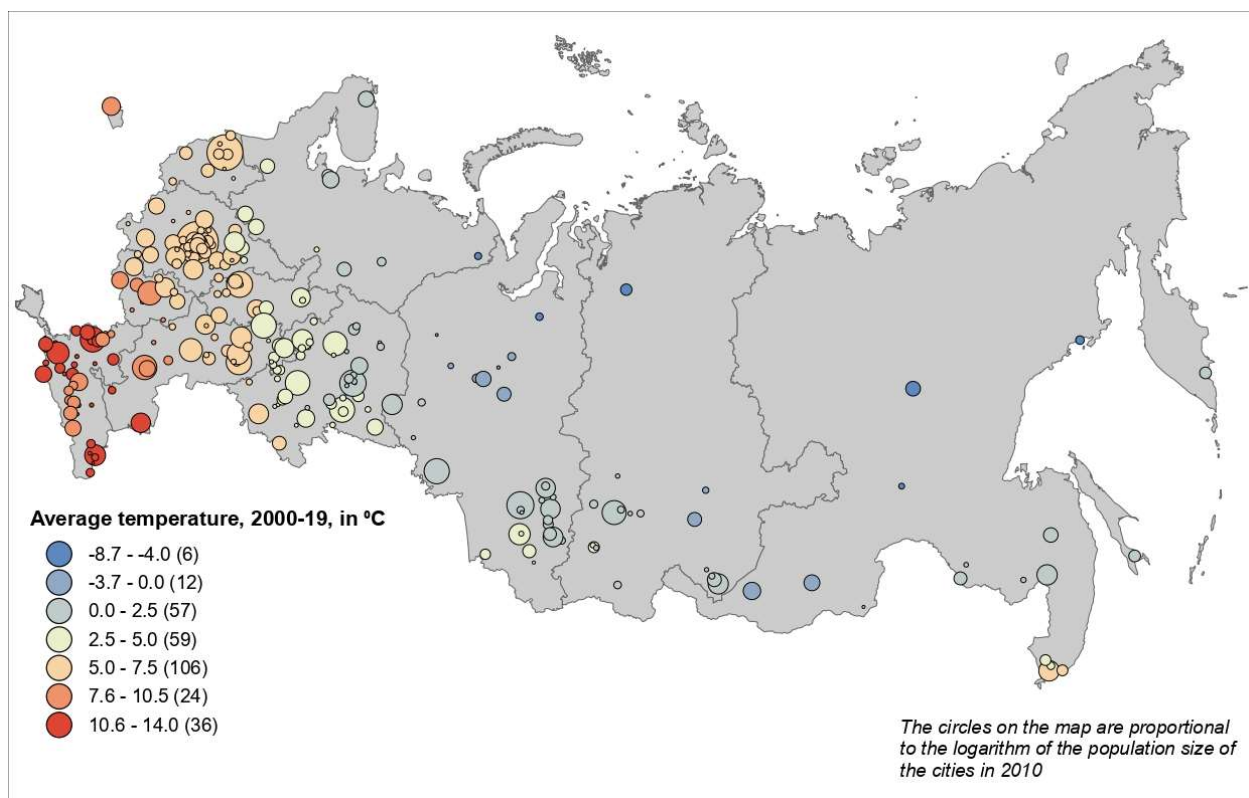

**Figure S4:** Mean annual temperature, average for 2000-2019.

**Source:** ERA5-Land reanalysis

#### A.4. Geographical distribution of meta-predictors

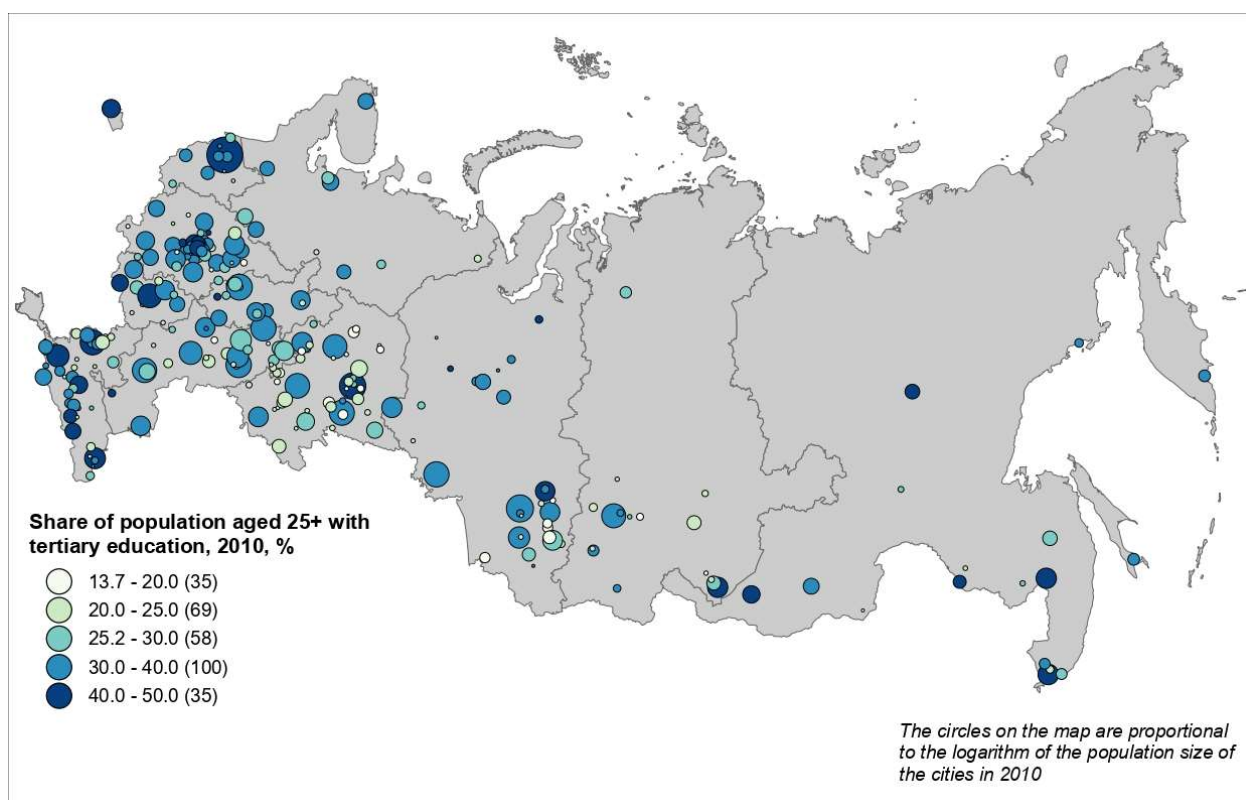

**Figure S5:** Share of population aged 25+ with tertiary education, both sexes, 2010.

*Source: 2010 Russian population census*

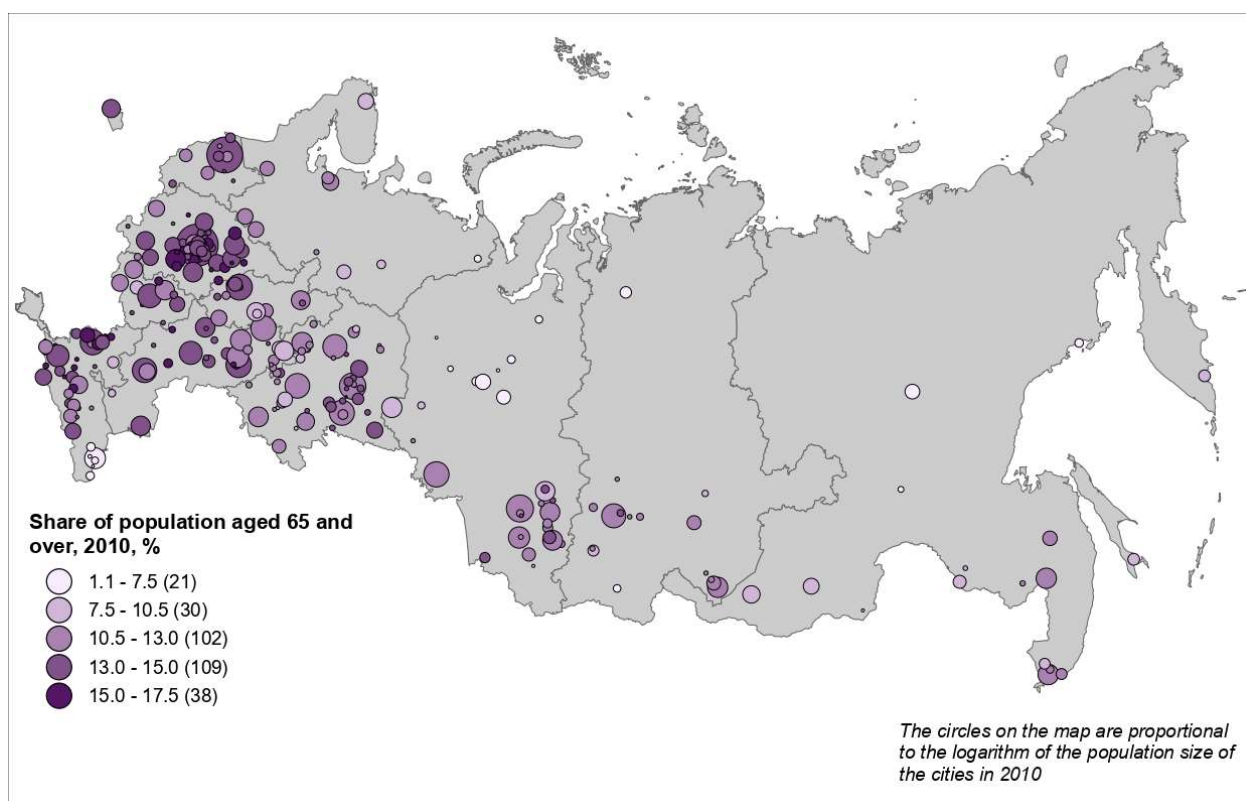

**Figure S6:** Share of population aged 65 and over, both sexes, 2010.

*Source: 2010 Russian population census*

## B. Additional information on modeling

**Table S1:** First-stage sensitivity analysis.

| Model                                   |                | MMT (°C) | Percentile of MMT | Akaike Information Criterion |
|-----------------------------------------|----------------|----------|-------------------|------------------------------|
| Baseline model                          |                | 19.23    | 88                | 9 576 057                    |
| Model with quadratic B-spline           |                | 20.64    | 92                | 9 577 012                    |
| Percentiles of temperature distribution | 10, 25, 75, 90 | 19.57    | 88                | 9 577 075                    |
|                                         | 10,50,90       | 17.07    | 84                | 9 577 355                    |
|                                         | 10, 90         | 15.83    | 85                | 9 579 268                    |
|                                         | 25,75          | 15.51    | 84                | 9 579 390                    |
| Maximum lag                             | 28             | 19.23    | 88                | 9 566 520                    |
| Model adjusted to relative humidity     |                | 19.23    | 88                | 9 576 856                    |
| Model adjusted to PM2.5                 |                | 19.23    | 88                | 9 576 373                    |
| Model adjusted to ozone                 |                | 19.23    | 87                | 9 576 231                    |

Data source: Daily relative humidity was extracted from the ERA5-Land reanalysis. Daily concentrations of PM2.5 and ozone were extracted from the following dataset: “Xu, R., Ye, T., Yue, X. et al. (2023). Global population exposure to landscape fire air pollution from 2000 to 2019. *Nature* 621, 521–529”.

### Multilevel random-effect meta-analysis

The city-level results were transformed into regional-level aggregates using an approach that extends model to account nested levels of hierarchy<sup>1,2</sup>. The grouping factor was represented by economic regions and expressed a hierarchical structure of random effects, allowing for the consideration of risk variations across two nested levels: cities within economic regions. Best Linear Unbiased Predictions (BLUP) borrow information across units within the same hierarchical level, providing more accurate estimates, particularly in locations with small daily mortality counts or short time series.<sup>3</sup>

#### References:

- 1 Sera F, Gasparrini A. Extended two-stage designs for environmental research. *Environ Health* 2022; 21: 41.
- 2 Sera F, Armstrong B, Blangiardo M, Gasparrini A. An extended mixed-effects framework for meta-analysis. *Statistics in Medicine* 2019; 38: 5429–44.
- 3 Vicedo-Cabrera AM, Sera F, Liu C, et al. Short term association between ozone and mortality: global two stage time series study in 406 locations in 20 countries. *BMJ* 2020; : m108.

**Table S2:** Significance test for predictors (p-value) and I-square statistic in multivariate random-effect meta-regression models

| <b>Model</b>                                   | <b>Predictor</b>                              | <b>P-value test for predictor</b> | <b>I-square statistic</b> |
|------------------------------------------------|-----------------------------------------------|-----------------------------------|---------------------------|
| Intercept only                                 | --                                            | --                                | 43.7%                     |
| Single predictor                               | Mean annual temperature                       | <0.001                            | 29.1%                     |
|                                                | Temperature interquartile range               | 0.003                             | 42.5%                     |
|                                                | Population                                    | 0.19                              | 43.1%                     |
|                                                | Population in age over 65 (%)                 | 0.003                             | 40.9%                     |
|                                                | Population with higher level of education (%) | 0.002                             | 42.6%                     |
|                                                | GDP                                           | 0.07                              | 42.6%                     |
| Baseline model                                 | Intercept                                     | <0.001                            | 23%                       |
|                                                | Mean annual temperature                       | <0.001                            |                           |
|                                                | Temperature interquartile range               | <0.001                            |                           |
|                                                | Population                                    | 0.07                              |                           |
|                                                | Population in age over 65 (%)                 | 0.01                              |                           |
|                                                | Population with higher level of education (%) | 0.04                              |                           |
| Baseline model with GDP                        | Intercept                                     | <0.001                            | 23.2%                     |
|                                                | Mean annual temperature                       | <0.001                            |                           |
|                                                | Temperature interquartile range               | <0.001                            |                           |
|                                                | Population                                    | 0.29                              |                           |
|                                                | Population in age over 65 (%)                 | 0.84                              |                           |
|                                                | Population with higher level of education (%) | 0.01                              |                           |
|                                                | GDP                                           | 0.94                              |                           |
| Baseline model with GDP and without population | Intercept                                     | <0.001                            | 23.4%                     |
|                                                | Mean annual temperature                       | <0.001                            |                           |
|                                                | Temperature interquartile range               | <0.001                            |                           |
|                                                | Population in age over 65 (%)                 | 0.025                             |                           |
|                                                | Population with higher level of education (%) | 0.03                              |                           |
|                                                | GDP                                           | 0.27                              |                           |
| Baseline model without GDP and population      | Intercept                                     | <0.001                            | 23.9%                     |
|                                                | Mean annual temperature                       | <0.001                            |                           |
|                                                | Temperature interquartile range               | <0.001                            |                           |
|                                                | Population in age over 65 (%)                 | 0.006                             |                           |
|                                                | Population with higher level of education (%) | 0.02                              |                           |

### B.1. Sensitivity analysis to heat wave 2010

For the calculation of the exposure-lag-response associations of the main analyses, we excluded deaths in European Russia in July and August 2010 due to the high sensitivity of results to an extensive, intense and persistent heat wave observed during this period.<sup>1</sup> However, the mortality associated with this event was included in the calculation of attributable fractions and numbers.

The cities to be excluded were defined according to the temperature anomaly (more than 1.5 °C) in July-August 2010 compared to average for the same months in 1961-1990. In total, the data for 231 cities in European Russia were excluded from the main analysis.

We show here the comparison of some results obtained with July and August 2010 remaining in the analysis.

#### **References:**

1 Dole R, Hoerling M, Perlwitz J, *et al.* Was there a basis for anticipating the 2010 Russian heat wave?: THE 2010 RUSSIAN HEAT WAVE. *Geophys Res Lett* 2011; **38**: n/a-n/a

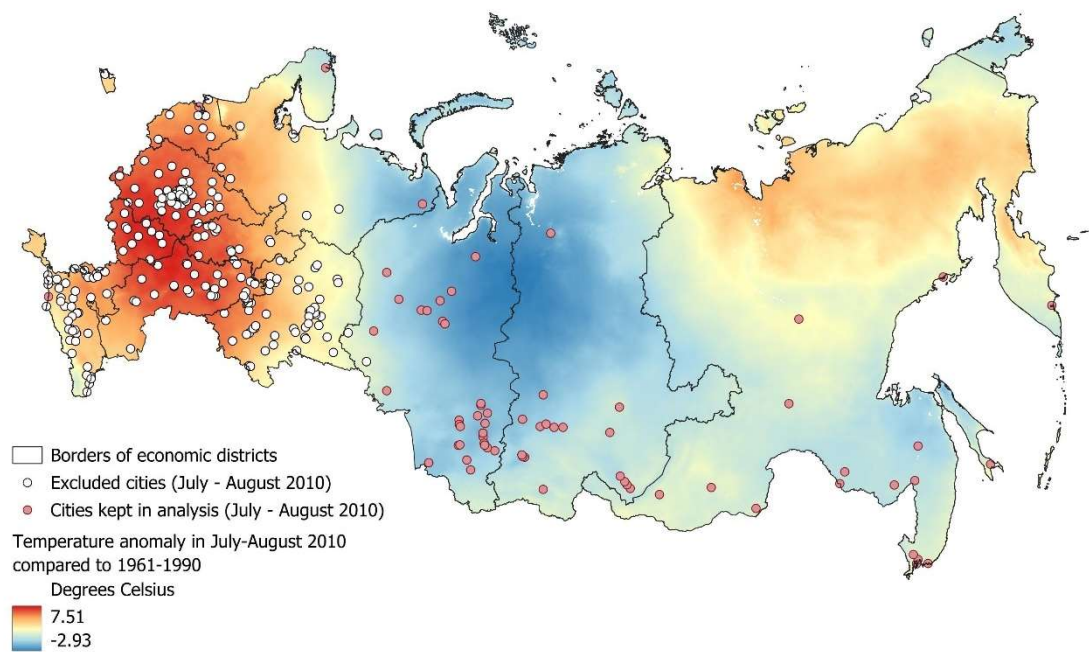

**Figure S5:** Map of cities excluded from main analysis for the period July-August 2010



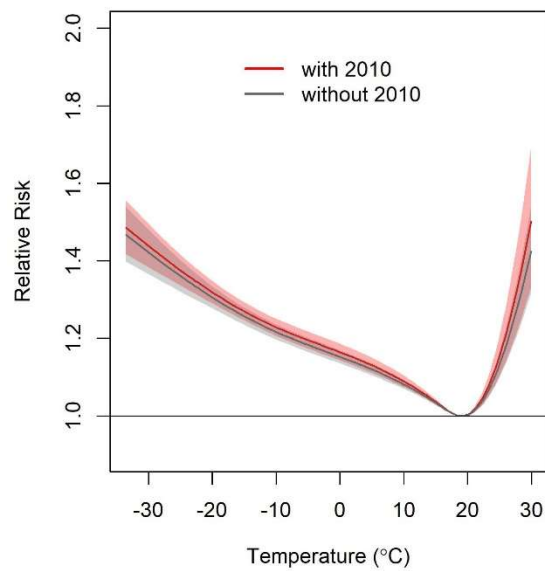

**Figure S6:** Pooled associations between daily temperature and non-accidental mortality, with and without July and August 2010 in the model

*Note: Shaded areas denote 95% confidence interval of relative risks (RRs)*

Moscow

Nizhniy Novgorod

St. Petersburg

With July and August 2010 in the model

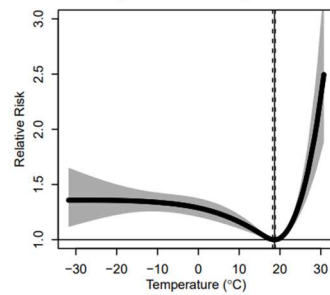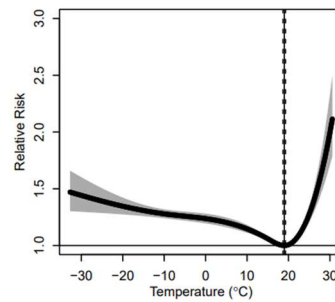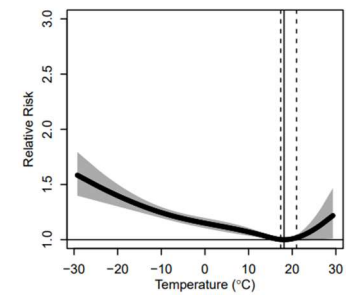

Without July and August 2010 in the model

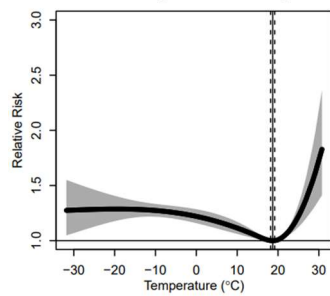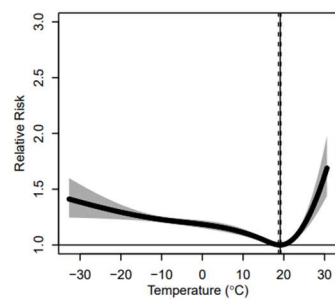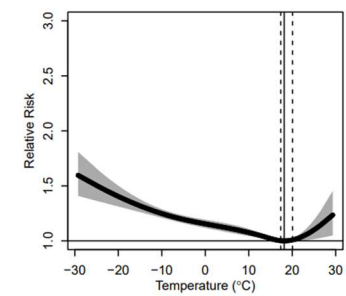

**Figure S7:** Pooled associations between daily temperature and non-accidental mortality in some major cities most affected by the heat wave 2010 (Moscow, Nizhniy Novgorod) and those less affected (St. Petersburg)

*Note:* Solid vertical lines denote minimum mortality temperature (MMT) and dashed vertical lines denote 95% eCI of MMT for the subgroups. Shaded areas denote 95% confidence interval of relative risks (RRs)

A

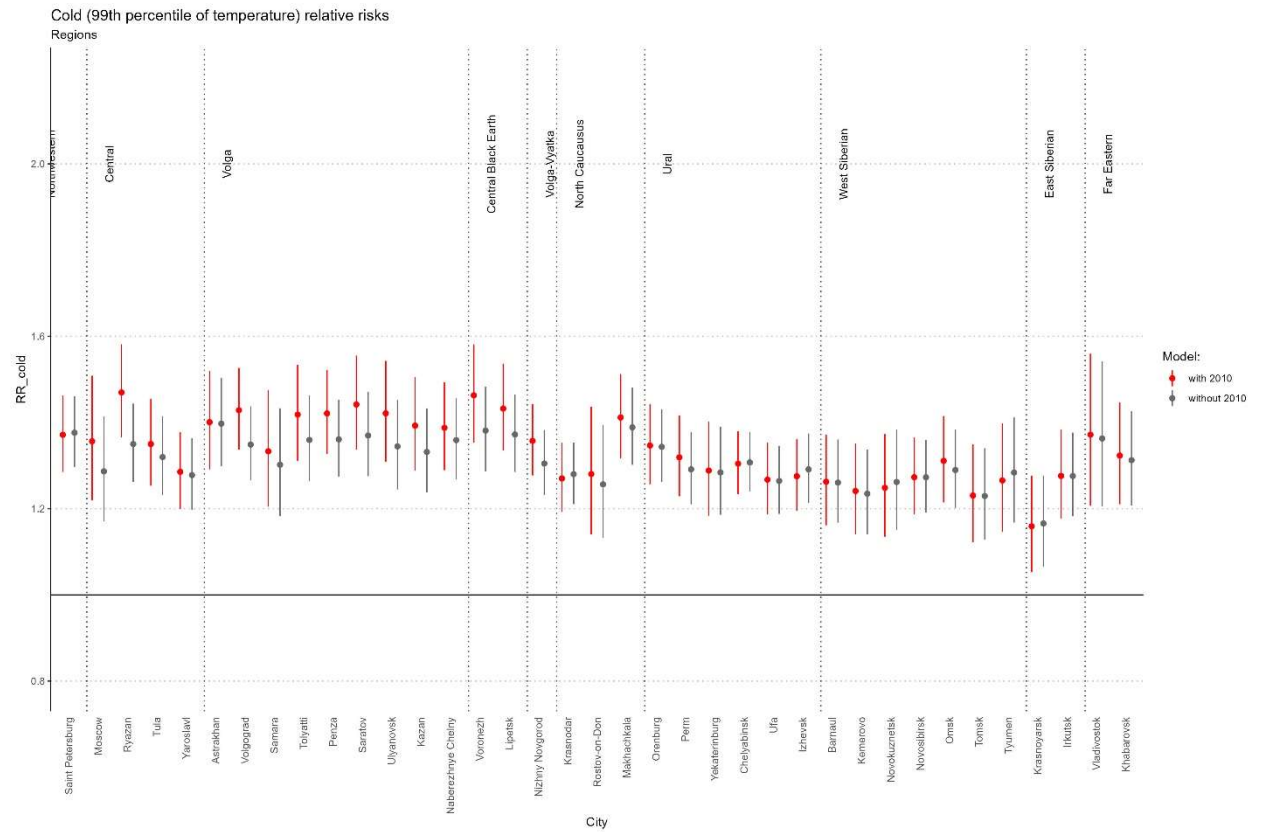

B

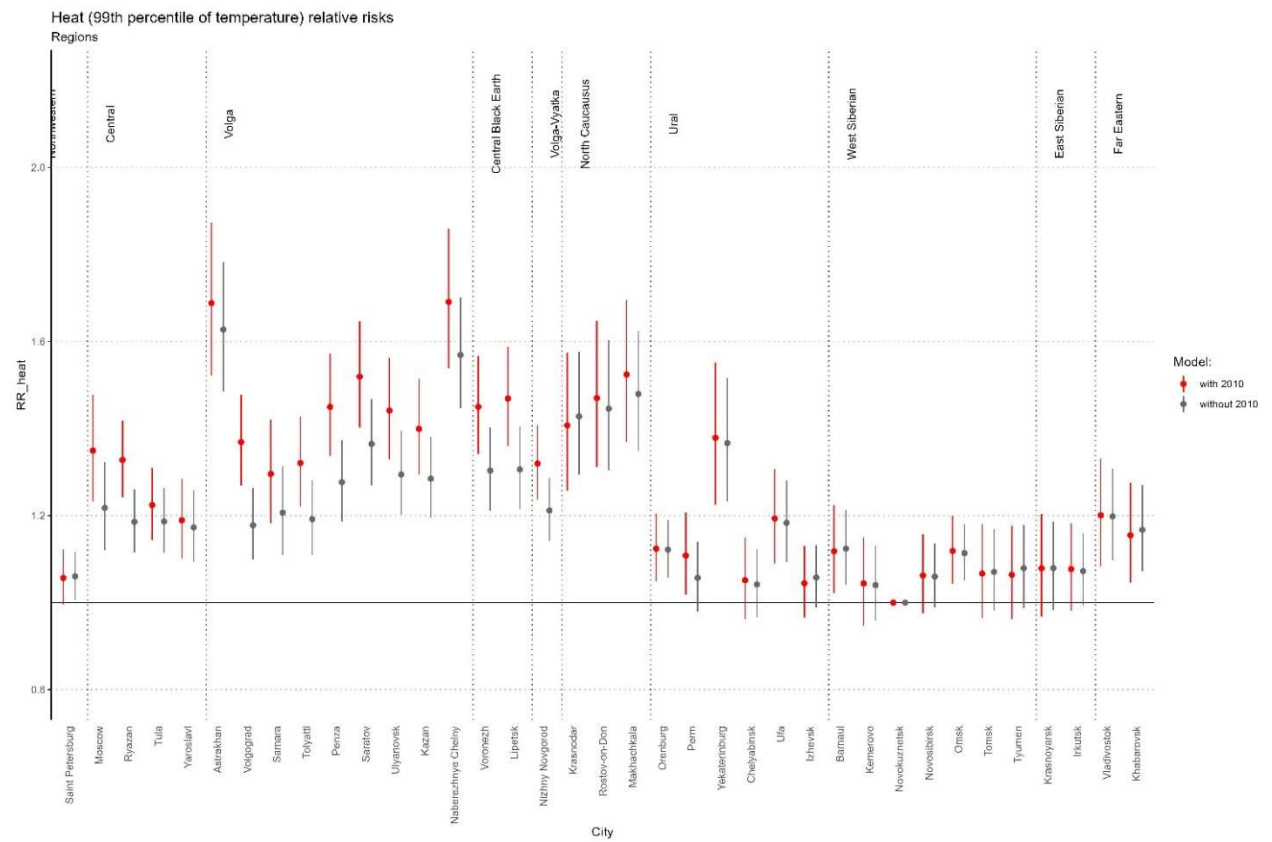

**Figure S8:** Cold (first percentile of temperature) (A) and heat (99th percentile of temperature) relative risks (RRs) (B) in most populated cities (more than 500,000 population), with and without July and August 2010 in the model

**Table S3:** Total mortality attributable fractions (AF) of deaths to the heat and cold in cities divided by different regions of Russia, with and without July and August 2010 in the model

| Region                 | Cold, %<br>(95% CI)                             |                                              | Heat, %<br>(95% CI)                             |                                              |
|------------------------|-------------------------------------------------|----------------------------------------------|-------------------------------------------------|----------------------------------------------|
|                        | Without July<br>and August 2010<br>in the model | With July and<br>August 2010 in<br>the model | Without July<br>and August 2010<br>in the model | With July and<br>August 2010 in<br>the model |
| All cities             | 10.47<br>(8.80, 11.99)                          | 11.51<br>(9.19, 13.78)                       | 0.67<br>(0.42, 0.88)                            | 0.81<br>(0.49, 1.14)                         |
| Northwestern           | 9.84<br>(7.55, 11.96)                           | 9.69<br>(7.14, 12.20)                        | 0.18<br>(-0.00, 0.35)                           | 0.17<br>(-0.02, 0.38)                        |
| Central                | 10.78<br>(9.11, 12.24)                          | 12.67<br>(9.62, 15.87)                       | 0.66<br>(0.49, 0.80)                            | 0.90<br>(0.60, 1.21)                         |
| West Siberian          | 9.73<br>(7.91, 11.56)                           | 9.84<br>(8.55, 11.03)                        | 0.24<br>(-0.05, 0.49)                           | 0.23<br>(-0.07, 0.53)                        |
| North<br>Caucasus      | 9.25<br>(7.27, 10.91)                           | 9.66<br>(6.81, 12.65)                        | 1.36<br>(1.05, 1.60)                            | 1.39<br>(0.94, 1.85)                         |
| East Siberian          | 10.42<br>(8.13, 12.60)                          | 10.51<br>(8.04, 12.80)                       | 0.33<br>(-0.04, 0.66)                           | 0.34<br>(-0.07, 0.76)                        |
| Far Eastern            | 12.52<br>(10.15, 14.85)                         | 12.97<br>(11.19, 14.70)                      | 0.59<br>(0.26, 0.88)                            | 0.58<br>(0.15, 1.01)                         |
| Northern               | 14.01<br>(10.54, 17.50)                         | 14.19<br>(10.51, 17.61)                      | 0.08<br>(-0.08, 0.22)                           | 0.10<br>(-0.07, 0.27)                        |
| Volga                  | 10.82<br>(9.25, 12.35)                          | 12.89<br>(10.49, 15.31)                      | 1.24<br>(0.97, 1.46)                            | 1.59<br>(1.27, 1.93)                         |
| Central Black<br>Earth | 10.35<br>(7.76, 12.54)                          | 12.47<br>(9.95, 15.11)                       | 1.02<br>(0.69, 1.30)                            | 1.35<br>(1.05, 1.66)                         |
| Volga-Vyatka           | 10.51<br>(8.31, 12.53)                          | 12.33<br>(10.13, 14.68)                      | 0.75<br>(0.41, 1.04)                            | 1.05<br>(0.74, 1.36)                         |
| Kaliningrad            | 8.03<br>(4.99, 10.80)                           | 8.90<br>(5.51, 12.10)                        | 0.28<br>(-0.13, 0.62)                           | 0.34<br>(-0.08, 0.76)                        |
| Ural                   | 10.13<br>(8.82, 11.42)                          | 10.30<br>(8.18, 12.20)                       | 0.43<br>(0.20, 0.62)                            | 0.45<br>(0.10, 0.82)                         |

**Table S10:** Total attributable numbers (AN) of deaths to the heat and cold in cities divided by different regions of Russia, with and without July and August 2010 in the model

| Region              | Cold, deaths                              |                                        | Heat, deaths                              |                                        |
|---------------------|-------------------------------------------|----------------------------------------|-------------------------------------------|----------------------------------------|
|                     | Without July and August 2010 in the model | With July and August 2010 in the model | Without July and August 2010 in the model | With July and August 2010 in the model |
| All cities          | 99631<br>(83731, 114145)                  | 109543<br>(87522, 131142)              | 6376<br>(4014, 8345)                      | 7724<br>(4629, 10893)                  |
| Northwestern        | 7440<br>(5711, 9038)                      | 7325<br>(5396, 9226)                   | 140<br>(-0, 265)                          | 131<br>(-19, 288)                      |
| Central             | 28558<br>(24148, 32422)                   | 33585<br>(25495, 42045)                | 1757<br>(1294, 2112)                      | 2379<br>(1594, 3193)                   |
| West Siberian       | 8746<br>(7112, 10391)                     | 8843<br>(7682, 9916)                   | 216<br>(-44, 443)                         | 206<br>(-63, 476)                      |
| North Caucasus      | 8036<br>(6317, 9476)                      | 8389<br>(5912, 10988)                  | 1177<br>(915, 1390)                       | 1207<br>(815, 1605)                    |
| East Siberian       | 4546<br>(3546, 5495)                      | 4585<br>(3504, 5584)                   | 143<br>(-18, 288)                         | 147<br>(-30, 332)                      |
| Far Eastern         | 4056<br>(3288, 4811)                      | 4202<br>(3628, 4763)                   | 191<br>(83, 285)                          | 187<br>(48, 328)                       |
| Northern            | 3526<br>(2653, 4407)                      | 3573<br>(2645, 4434)                   | 21<br>(-19, 55)                           | 25<br>(-18, 68)                        |
| Volga               | 12353<br>(10556, 14101)                   | 14711<br>(11978, 17480)                | 1411<br>(1110, 1666)                      | 1818<br>(1449, 2201)                   |
| Central Black Earth | 4200<br>(3151, 5089)                      | 5061<br>(4038, 6133)                   | 414<br>(282, 526)                         | 548<br>(426, 673)                      |
| Volga-Vyatka        | 4817<br>(3812, 5746)                      | 5651<br>(4643, 6732)                   | 344<br>(189, 477)                         | 479<br>(340, 624)                      |
| Kaliningrad         | 433<br>(269, 583)                         | 480<br>(297, 653)                      | 15<br>(-7, 33)                            | 18<br>(-5, 41)                         |
| Ural                | 12919<br>(11248, 14563)                   | 13139<br>(10429, 15557)                | 547<br>(256, 791)                         | 580<br>(125, 1043)                     |

## C. Additional results

### C.1. Exposure–response associations

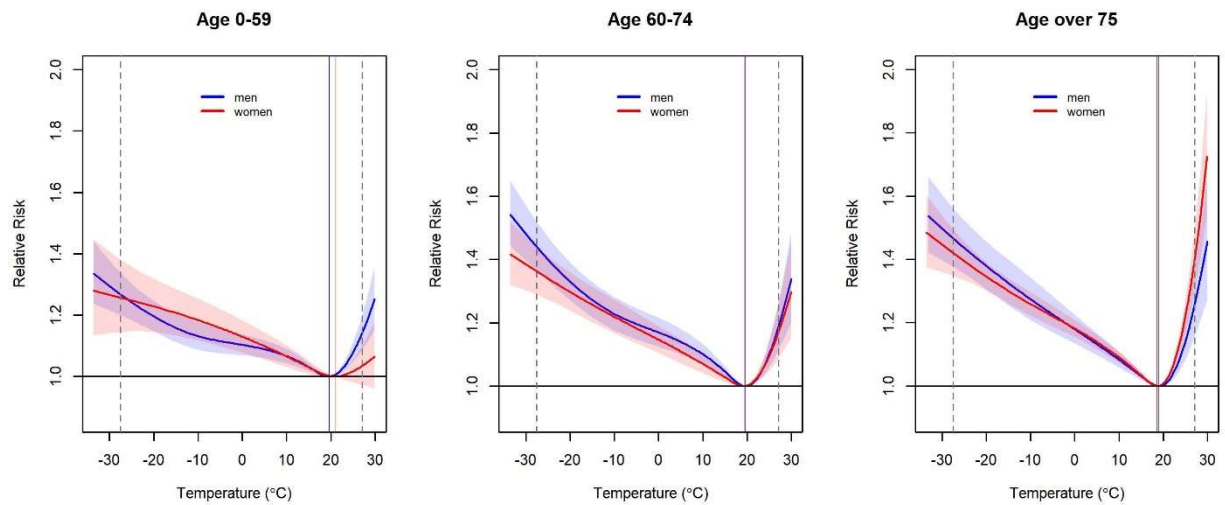

**Figure S11:** Pooled overall cumulative exposure–response relationship predicted for women and men at different ages

*Note: Here and throughout dashed vertical lines denote the 1st and 99th percentiles of the temperature distributions. Solid vertical lines denote minimum mortality temperature (MMT) for the subgroups. Shaded areas denote 95% confidence interval of relative risks (RRs)*

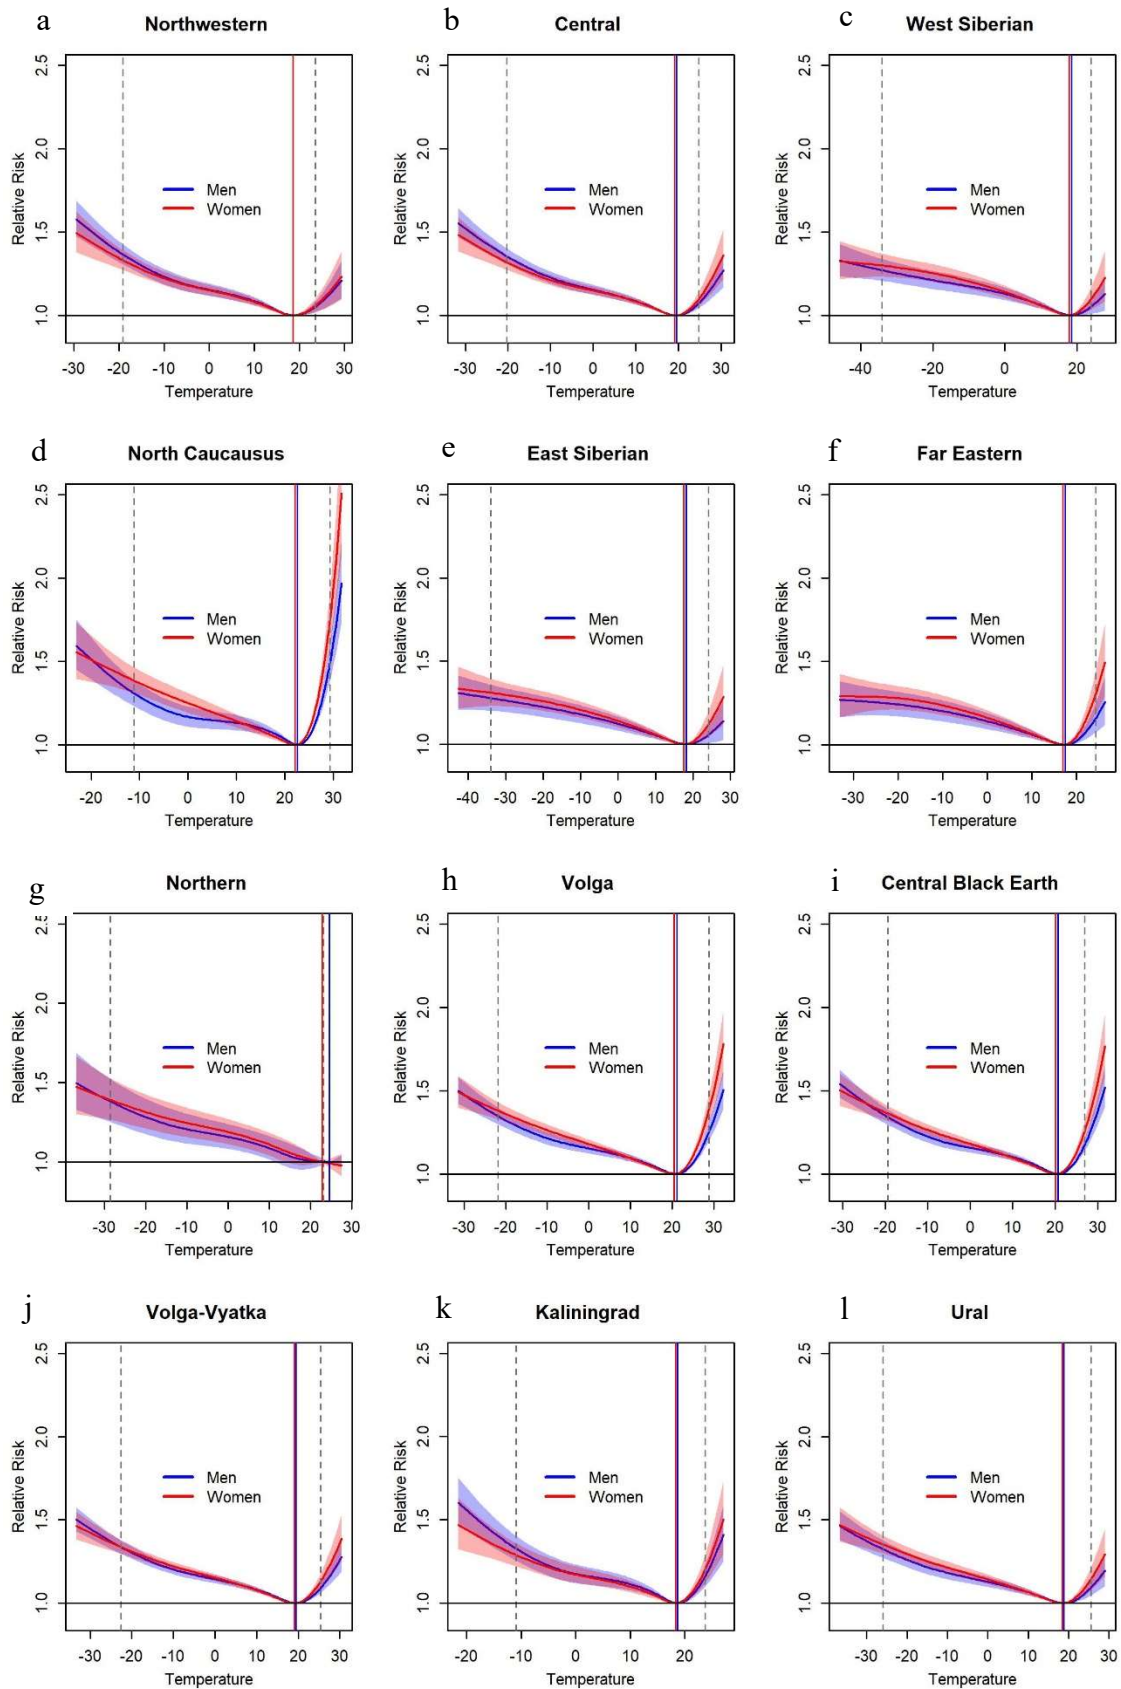

**Figure S12:** Pooled overall cumulative exposure–response relationship predicted for women and men at all ages according to various regions. *Note: European part – a, g (north and northwest); b, h, i, j (central), d (south); k – Kaliningrad (exclave between Lithuania and Poland). Ural – l. Siberia – c, e. Far East – f.*

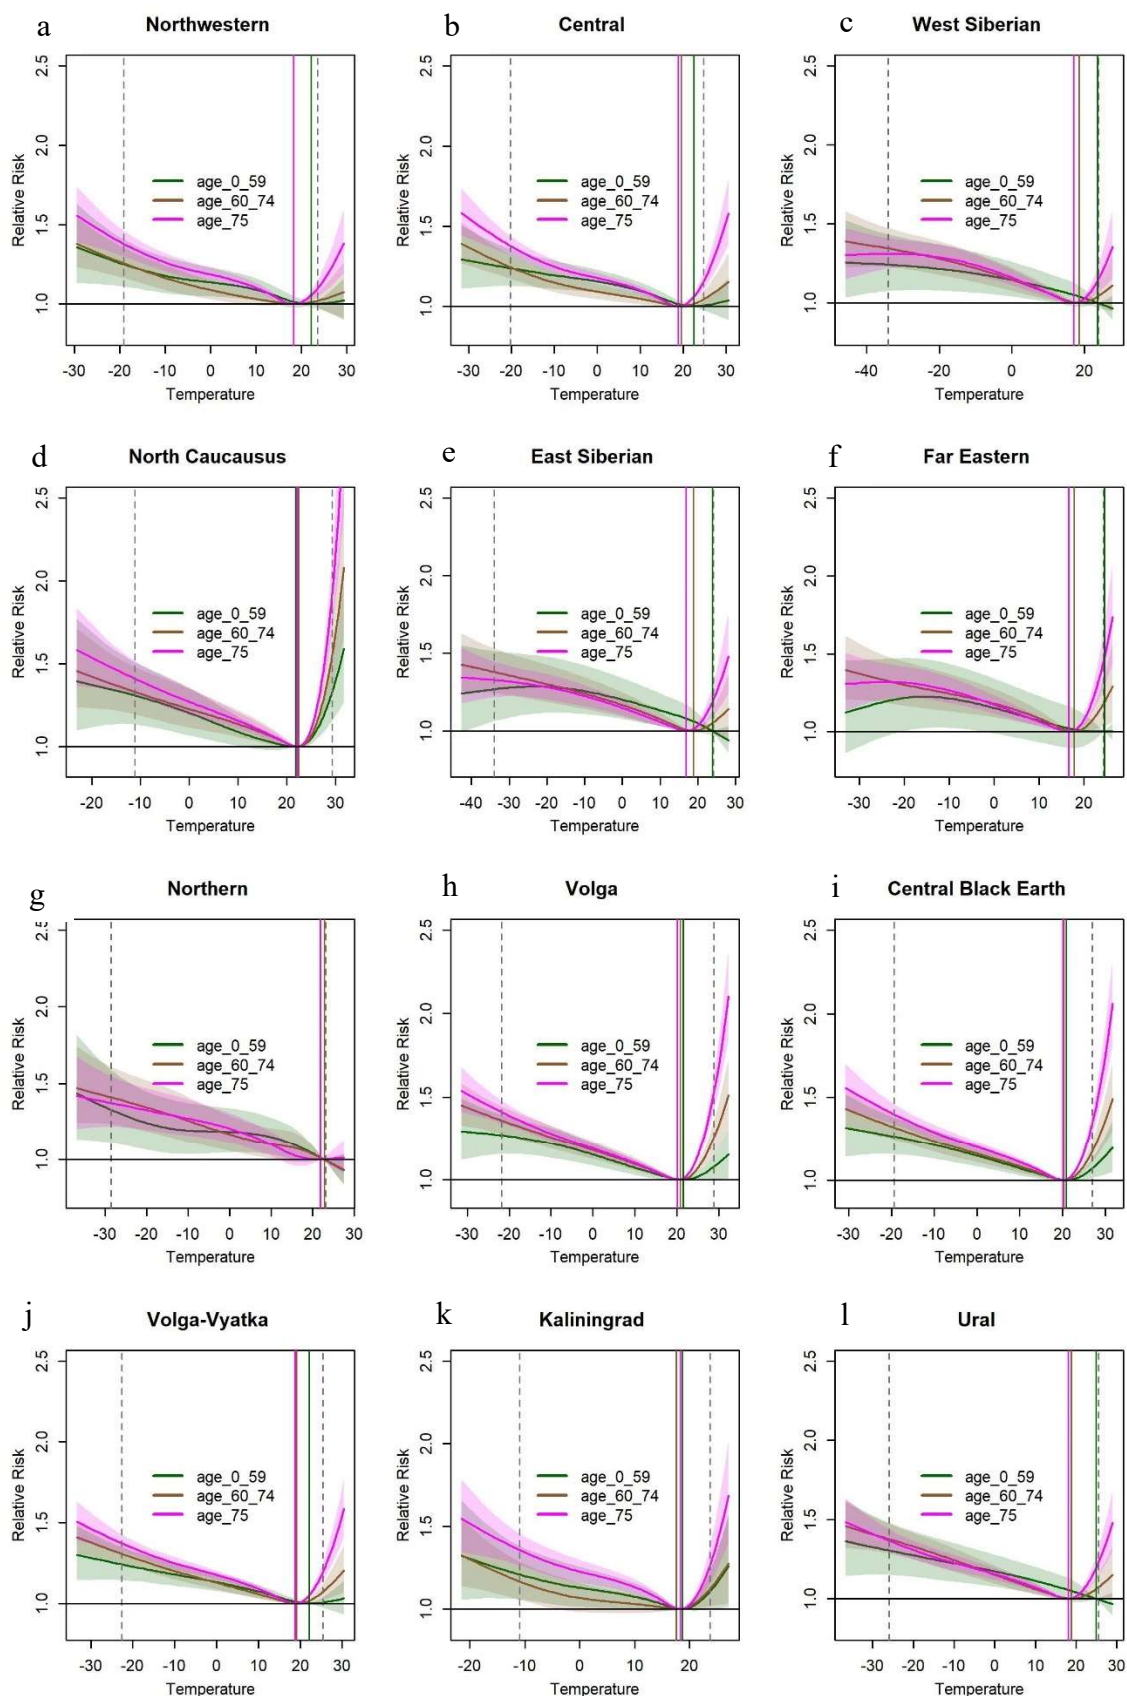

**Figure S13:** Pooled overall cumulative exposure-response relationship predicted for women at different age groups according to various regions. *Note: European part – a, g (north and northwest); b, h, i, j (central), d (south); k – Kaliningrad (exclave between Lithuania and Poland). Ural – l. Siberia – c, e. Far East – f.*



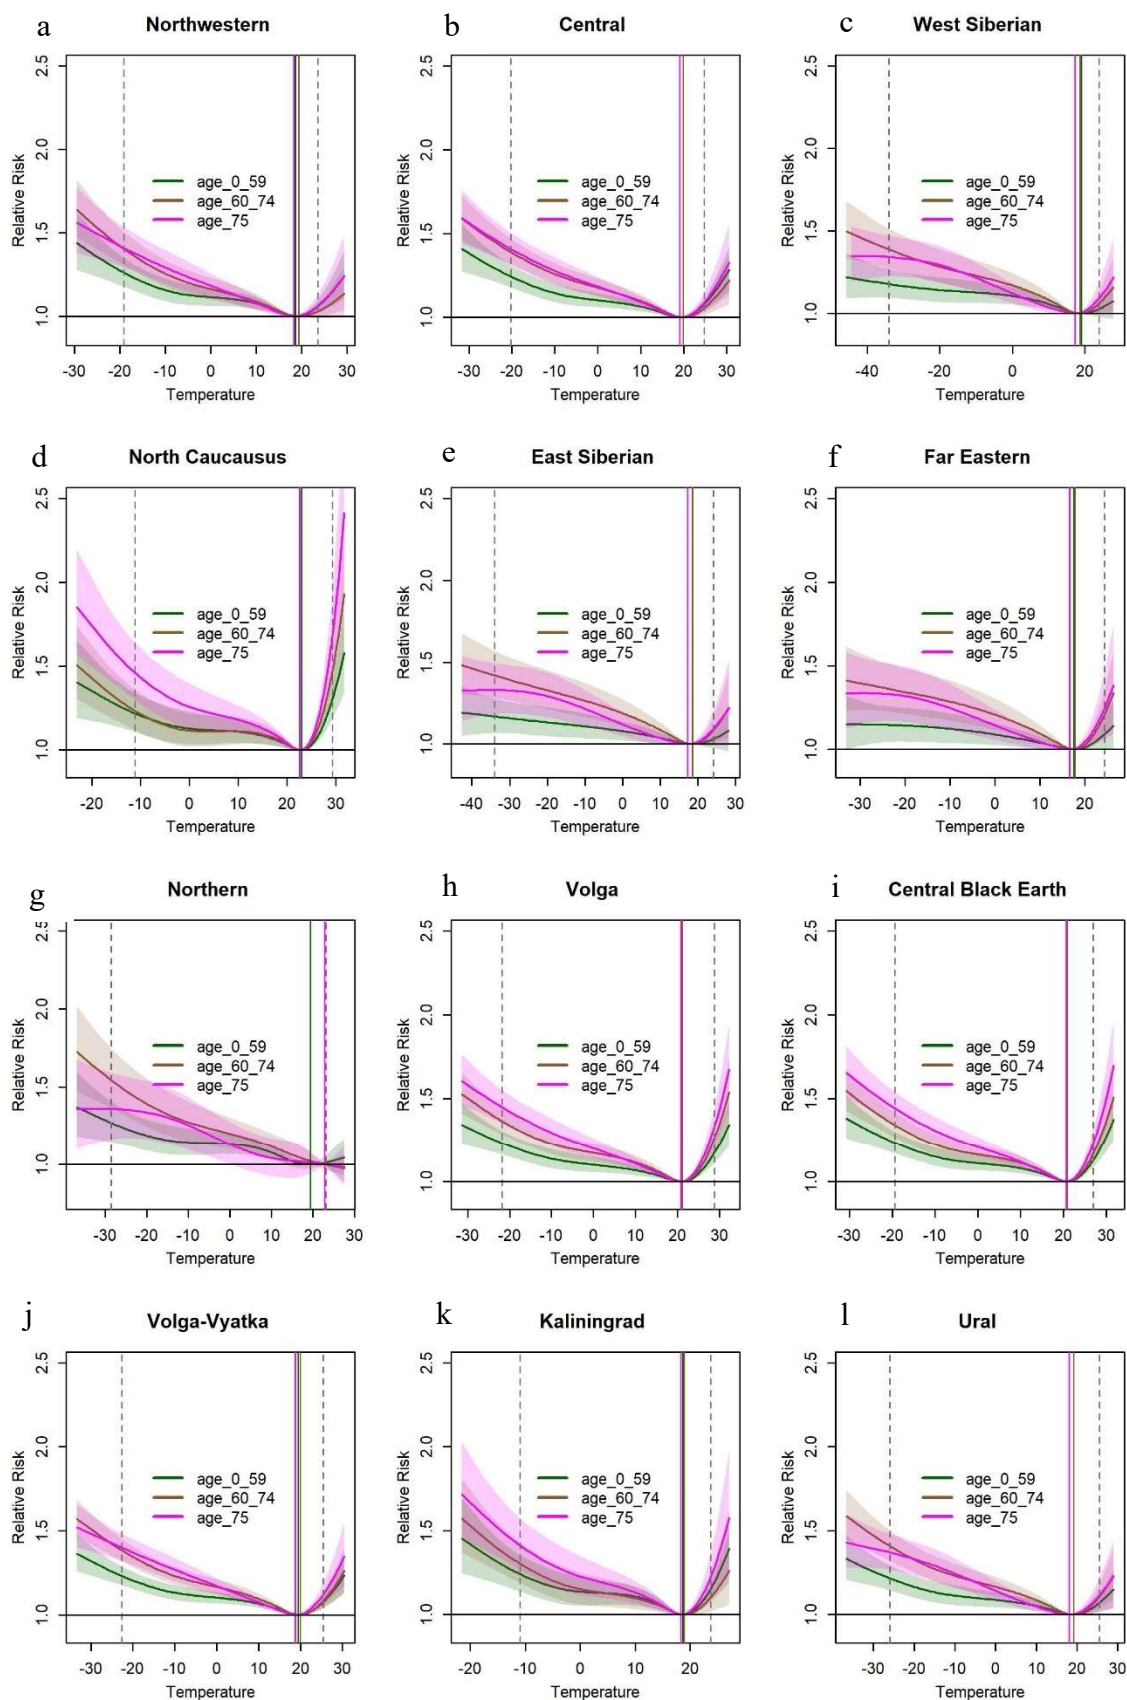

**Figure S14:** Pooled overall cumulative exposure–response relationship predicted for men at different age groups according to various regions. *Note: European part – a, g (north and northwest); b, h, i, j (central), d (south); k – Kaliningrad (exclave between Lithuania and Poland). Ural – l. Siberia – c, e. Far East – f.*

## C.2. Minimum Mortality Temperature

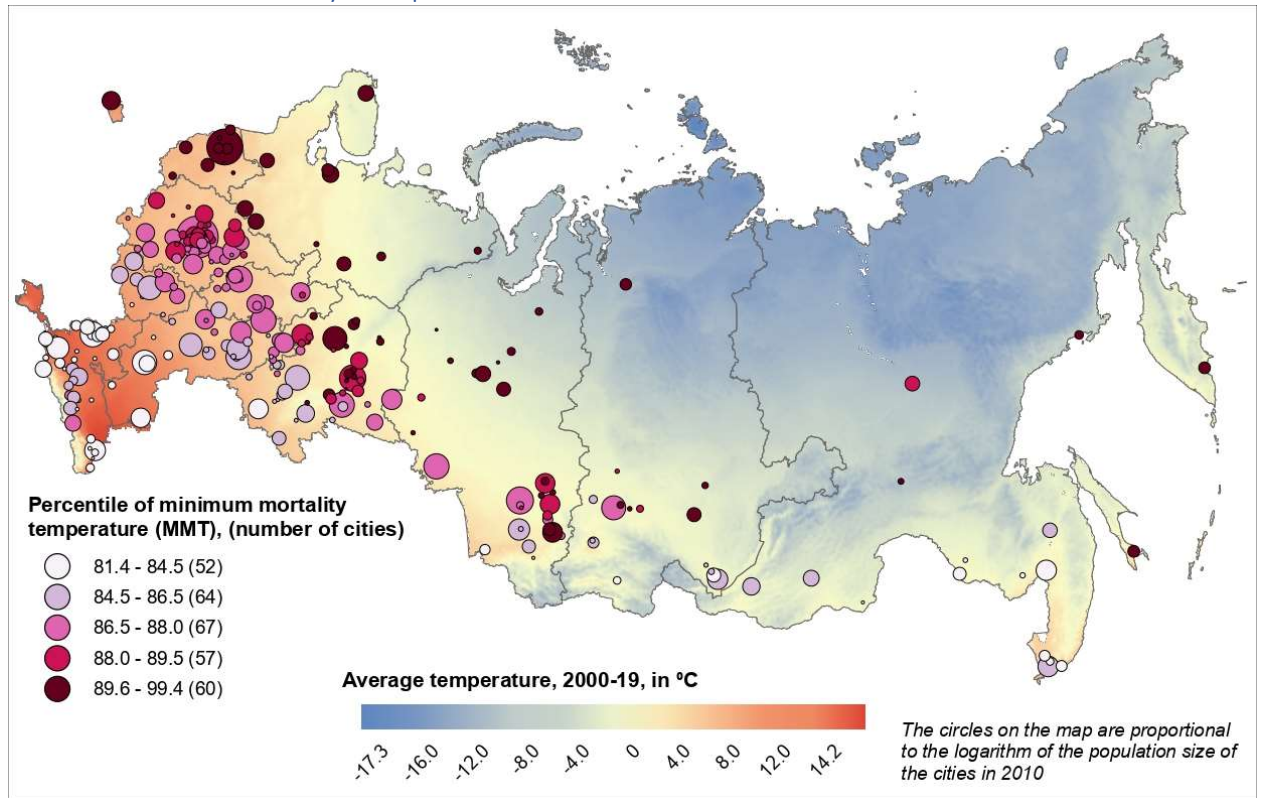

**Figure S15:** Percentile of MMT for both sexes at all ages across the 300 major Russian cities, 2000-19

### C.3. Relative risk ratios

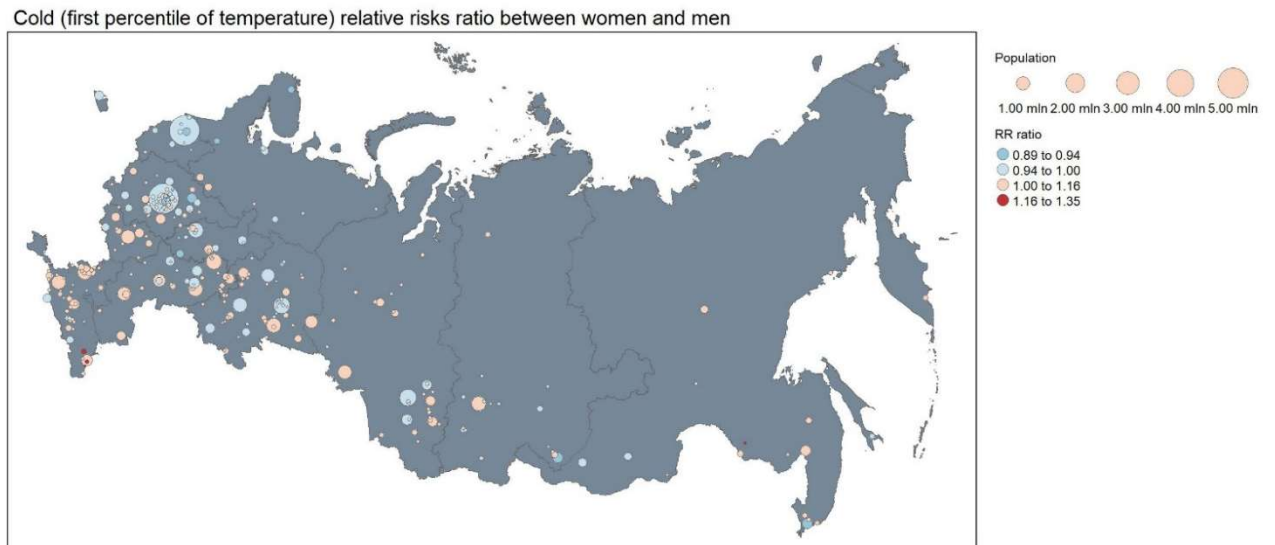

**Figure S16:** Cold-related relative risk ratio (first percentile of temperature distribution), males to females, all ages, 2000-19

Cold (first percentile of temperature) relative risks ratio between women and men

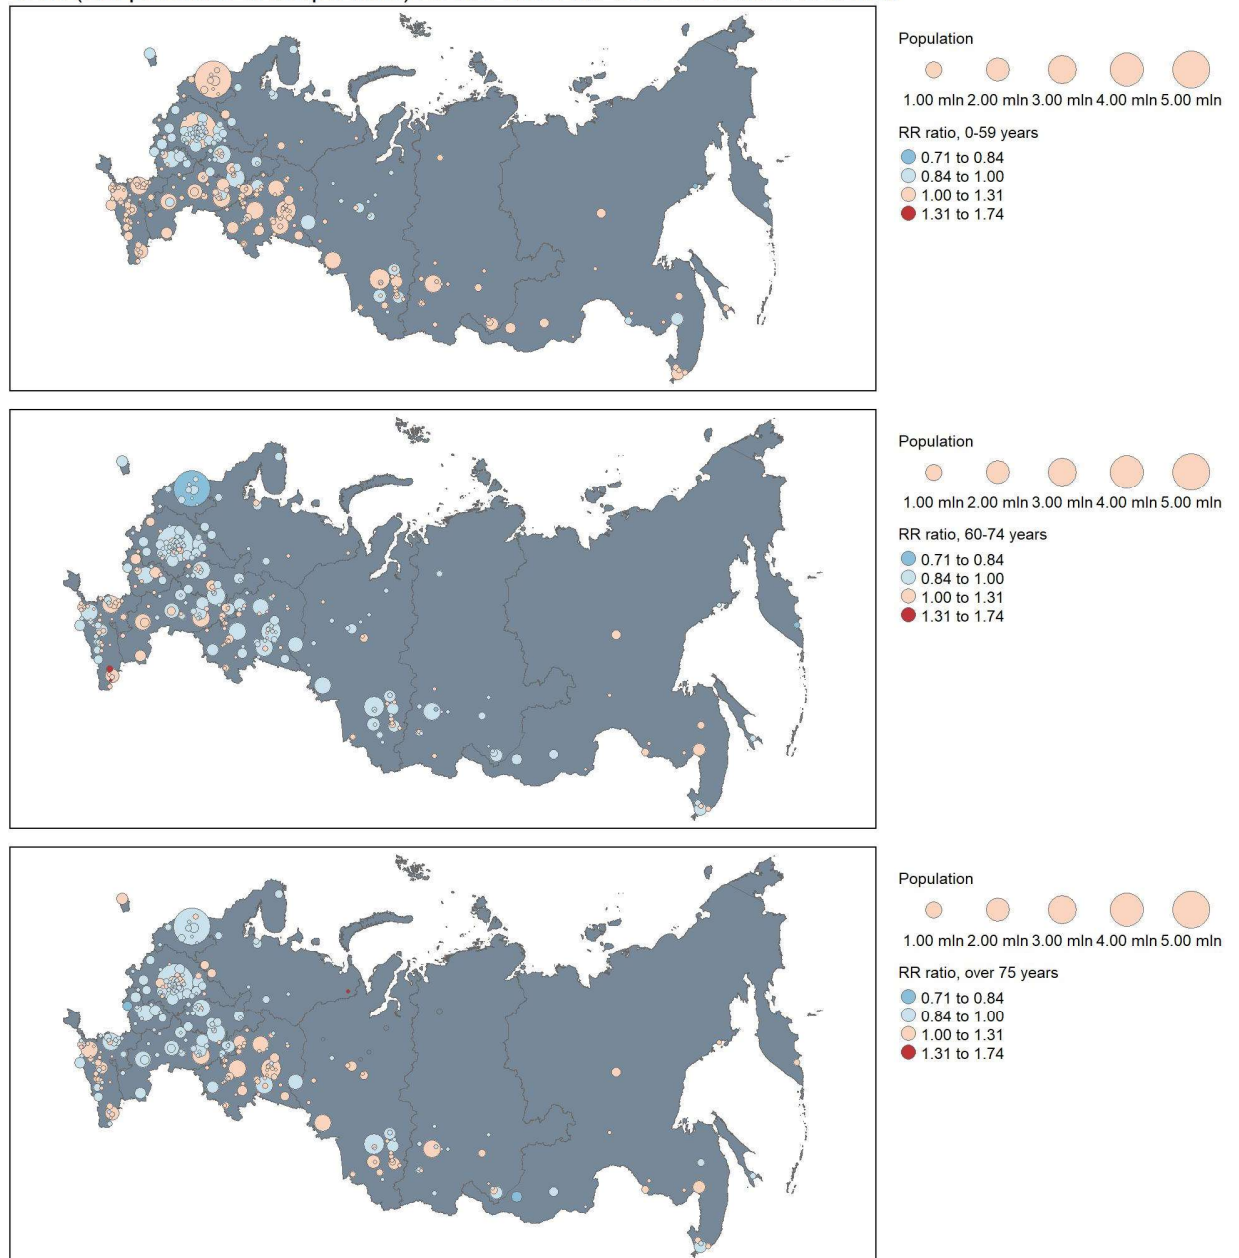

**Figure S17:** Cold-related relative risk ratio (first percentile of temperature distribution), males to females, different age groups, 2000-19.

Cold (first percentile of temperature) relative risks ratio between over 75 and 0-59 years age groups

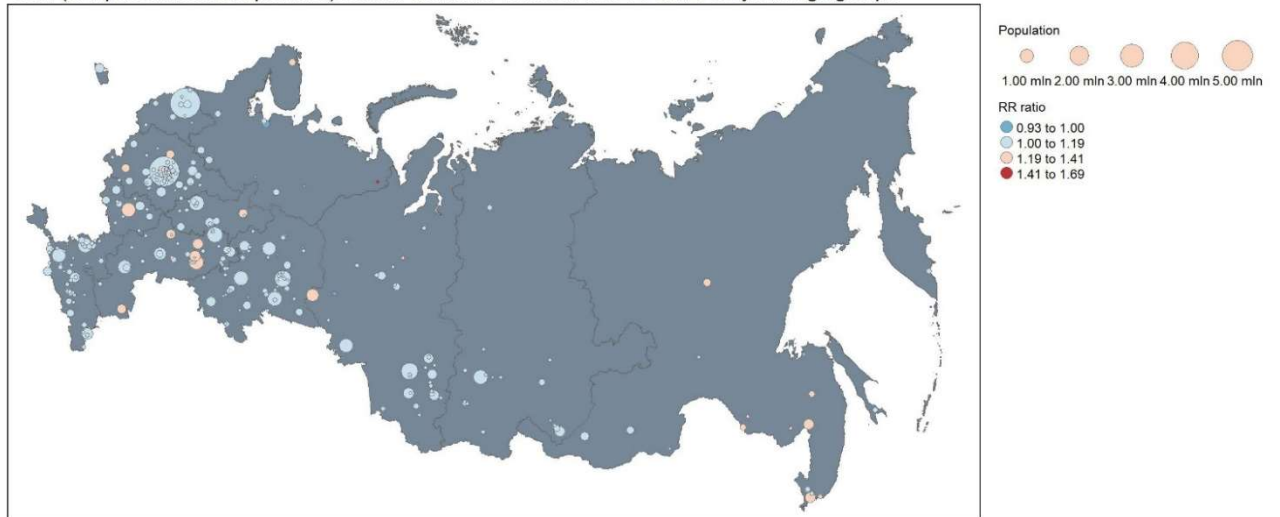

**Figure S18:** Cold-related relative risk ratio (first percentile of temperature distribution), 75+ to 0-59 years, 2000-19.

Heat (99th percentile of temperature) relative risks ratio between women and men

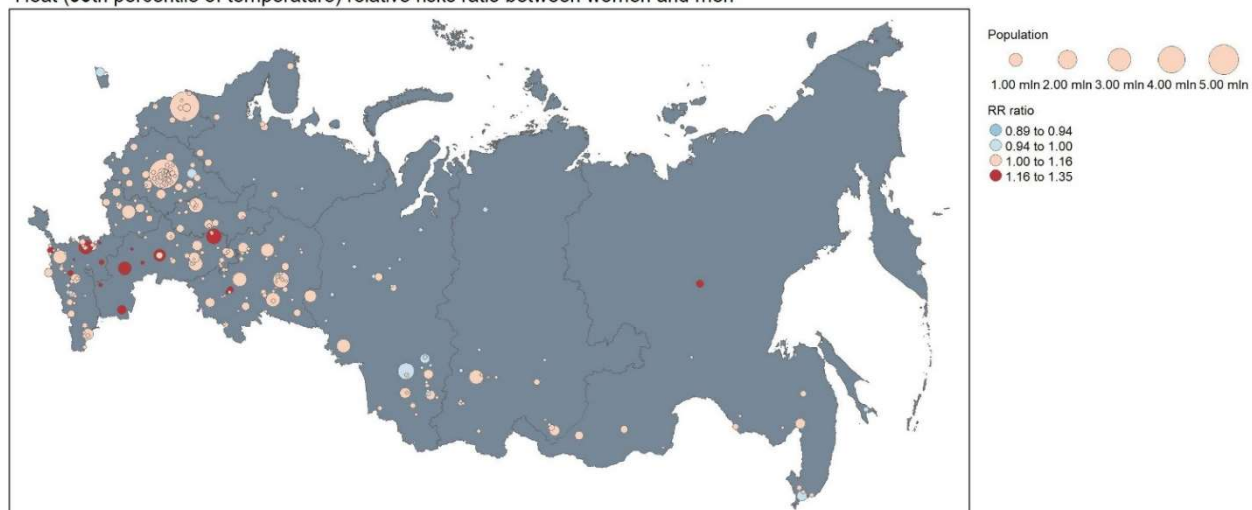

**Figure S19:** Heat-related relative risk ratio (99th percentile of temperature distribution), males to females, all ages, 2000-19.



Heat (99th percentile of temperature) relative risks ratio between women and men

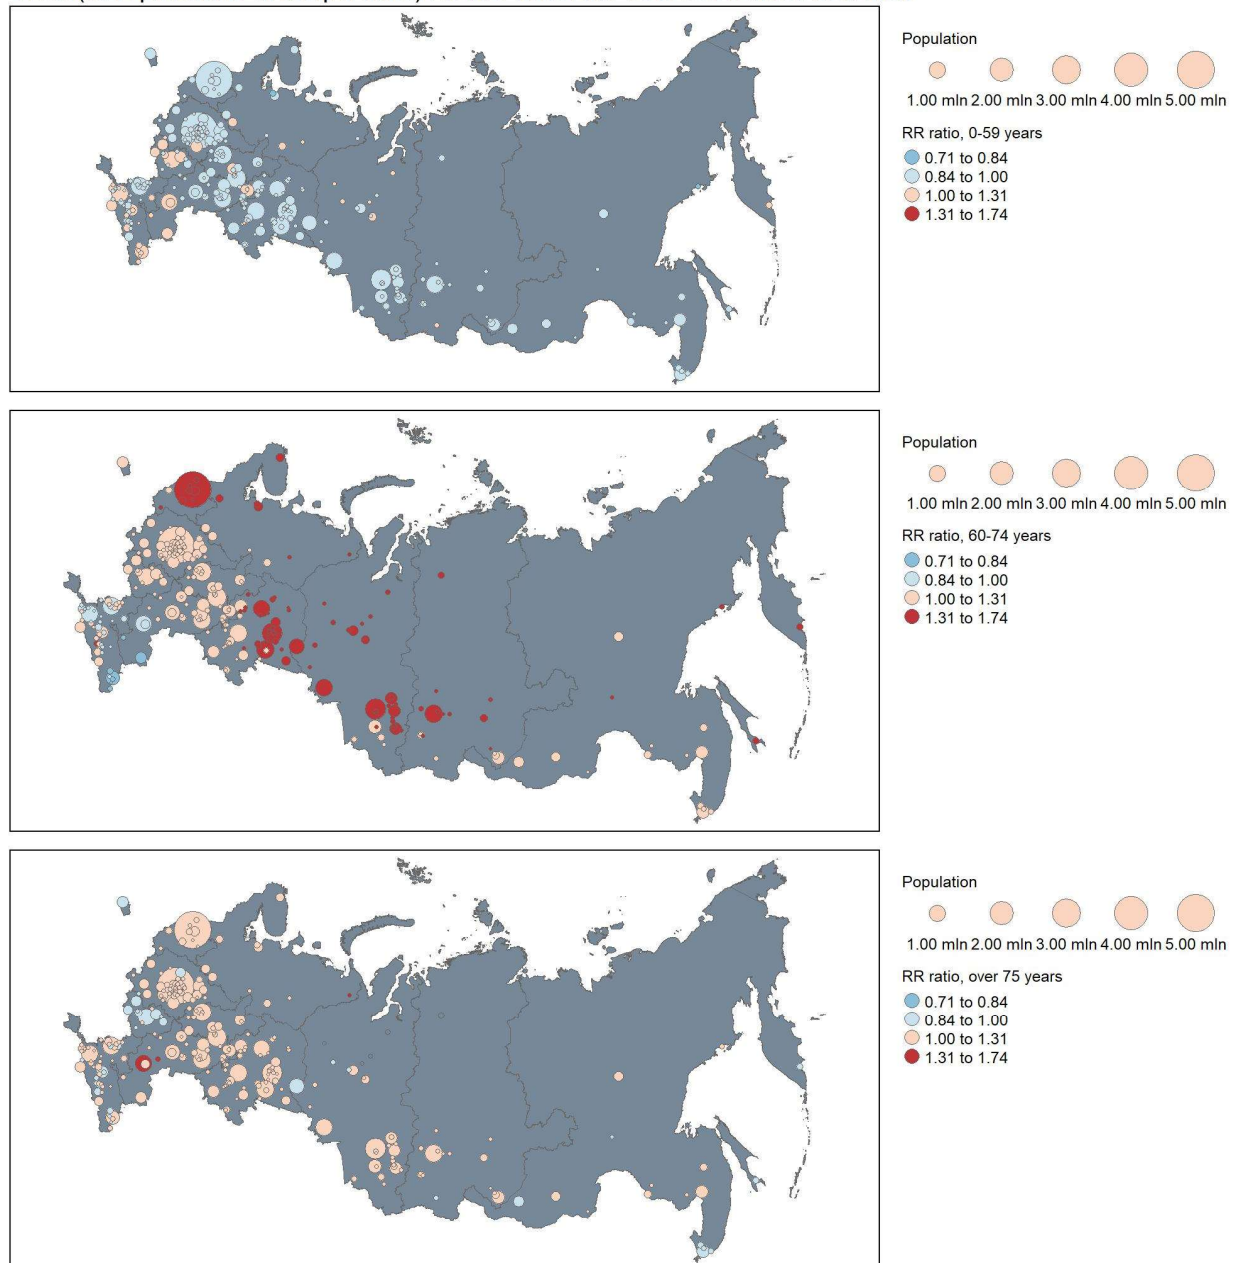

**Figure S20:** Heat-related relative risk ratio (99th percentile of temperature distribution), males to females, different age groups, 2000-19.

Heat (99th percentile of temperature) relative risks ratio between over 75 and 0-59 years age groups

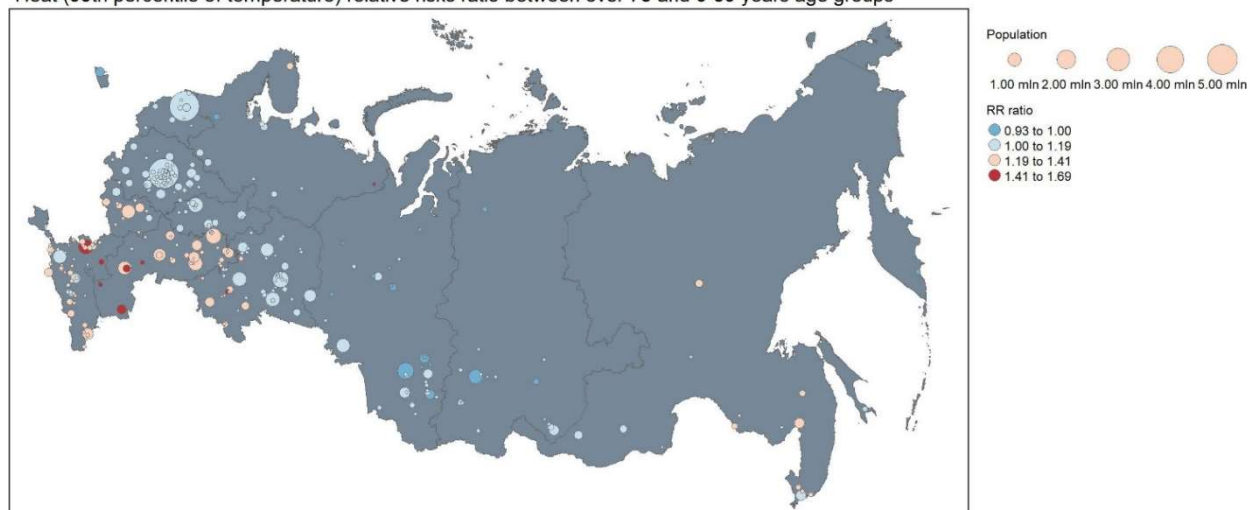

**Figure S21:** Heat-related relative risk ratio (99th percentile of temperature distribution), 75+ to 0-59 years, 2000-19



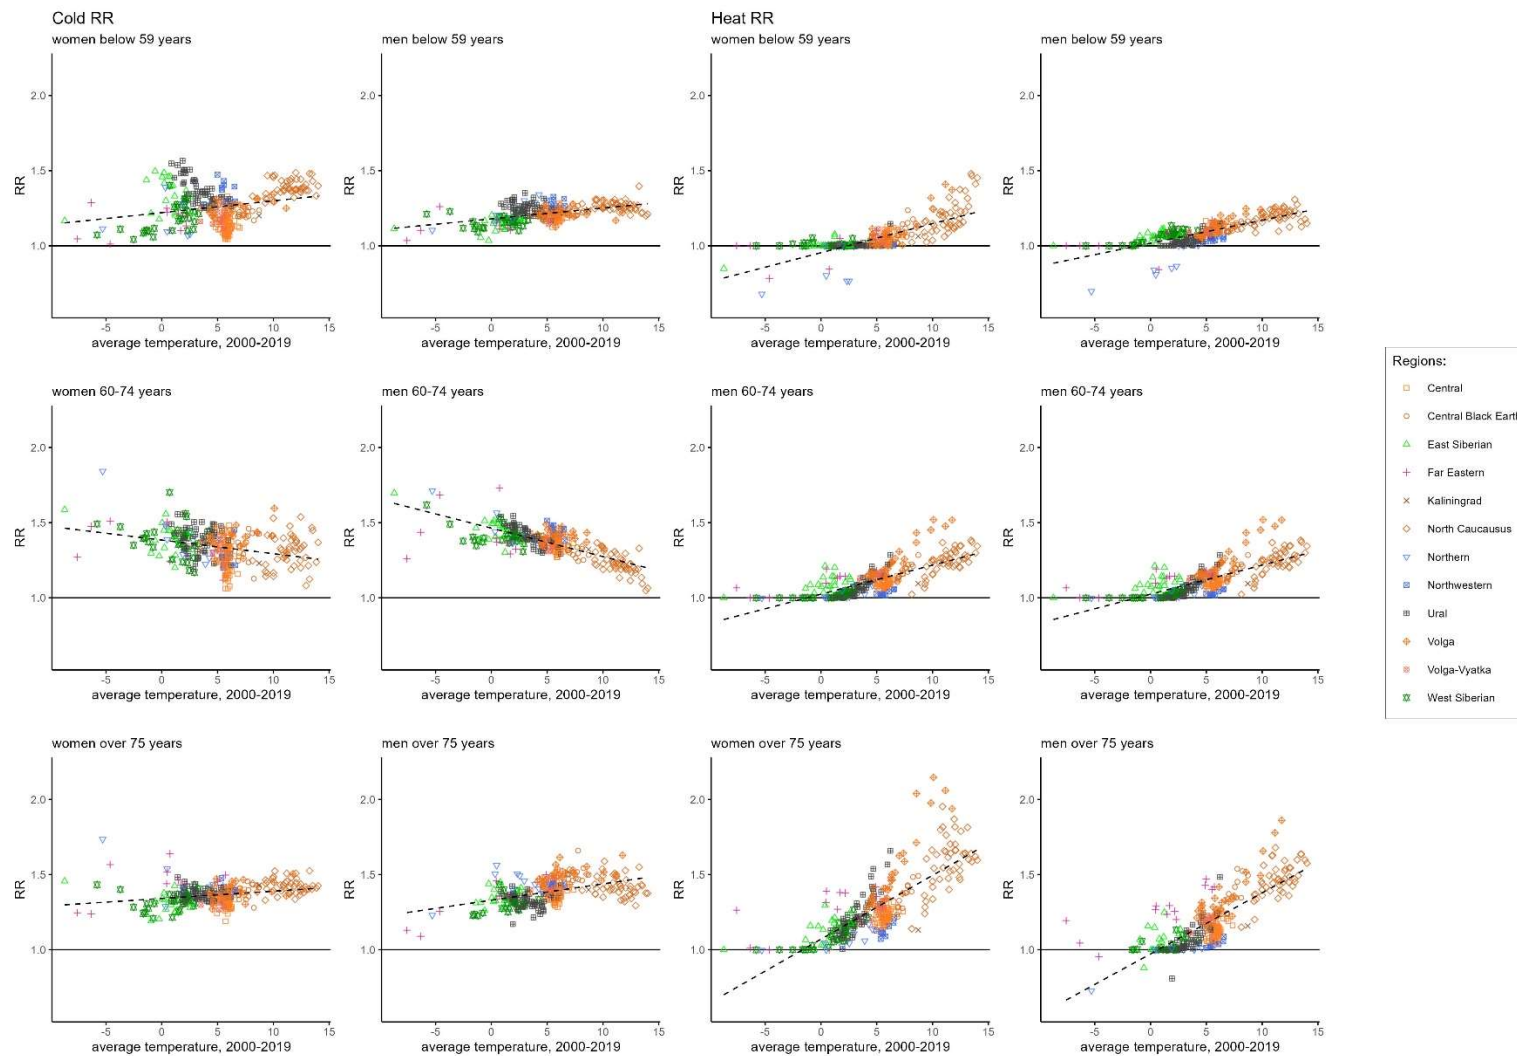

**Figure S22:** Relative risks (RRs) for temperature associated mortality for women and men at all ages across different ages in 300 major Russian cities, 2000-19

## C.4. Relative risks in most populated cities

a)

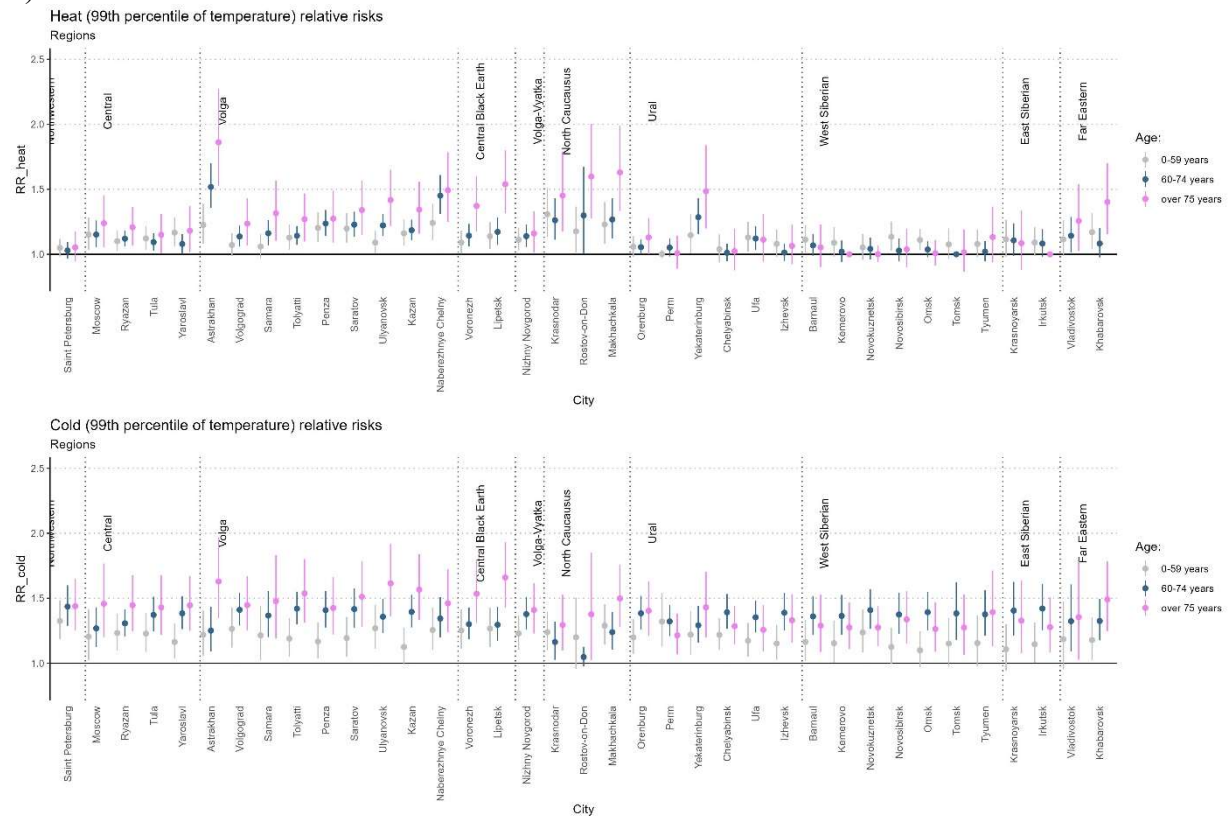

b)

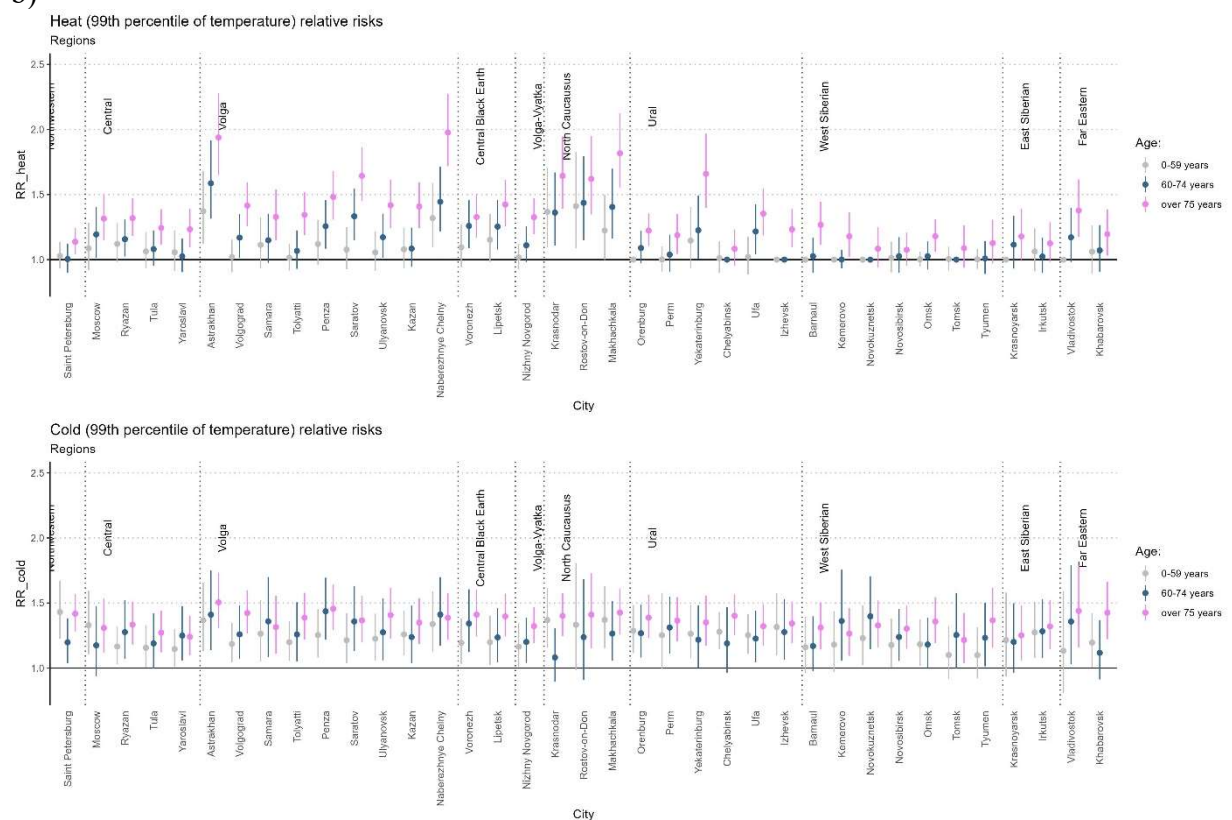

**Figure S23:** Relative risks (RRs) for temperature associated mortality for most populated cities (more than 500,000 population) for men (a) and women (b) at all ages

## C.5. Attributable fractions and attributable numbers of deaths

**Table S11:** Region-level attributable fractions for cold and heat for the population across different age groups, 2000-19

|                         | Cold                 |                     |       | Heat                |                     |       |
|-------------------------|----------------------|---------------------|-------|---------------------|---------------------|-------|
| Region                  | Women (95%CI)        | Men (95%CI)         | Ratio | Women (95%CI)       | Men (95%CI)         | Ratio |
| <b>All ages</b>         |                      |                     |       |                     |                     |       |
| All cities              | 10.63 (8.72, 12.62)  | 10.30 (7.26, 13.13) | 1.03  | 0.81 (0.67, 0.94)   | 0.51 (0.22, 0.78)   | 1.59  |
| Northern                | 13.42 (8.60, 17.85)  | 13.72 (9.84, 17.43) | 0.98  | 0.11 (-0.10, 0.33)  | 0.04 (-0.11, 0.18)  | 2.75  |
| Northwestern            | 9.47 (7.24, 11.66)   | 10.35 (6.94, 13.63) | 0.91  | 0.25 (0.10, 0.40)   | 0.11 (-0.07, 0.28)  | 2.27  |
| Kaliningrad             | 8.00 (4.84, 11.24)   | 9.41 (4.94, 13.53)  | 0.85  | 0.35 (-0.19, 0.88)  | 0.40 (-0.00, 0.76)  | 0.88  |
| Central                 | 10.70 (8.00, 13.25)  | 10.98 (7.00, 14.68) | 0.97  | 0.78 (0.43, 1.07)   | 0.53 (0.23, 0.80)   | 1.47  |
| Central Black Earth     | 10.50 (8.09, 12.99)  | 9.58 (6.21, 12.68)  | 1.10  | 1.16 (0.72, 1.57)   | 0.72 (0.48, 0.96)   | 1.61  |
| Volga                   | 11.03 (9.41, 12.70)  | 10.61 (8.00, 13.03) | 1.04  | 1.58 (1.37, 1.77)   | 0.90 (0.58, 1.17)   | 1.76  |
| Volga-Vyatka            | 10.39 (8.37, 12.50)  | 10.45 (6.91, 13.83) | 0.99  | 0.87 (0.45, 1.26)   | 0.55 (0.19, 0.86)   | 1.58  |
| North Caucasus          | 10.27 (7.82, 12.70)  | 8.43 (6.19, 10.48)  | 1.22  | 1.63 (1.34, 1.88)   | 1.08 (0.75, 1.38)   | 1.51  |
| Ural                    | 10.33 (8.43, 12.13)  | 9.78 (6.88, 12.51)  | 1.06  | 0.57 (0.43, 0.68)   | 0.29 (-0.04, 0.60)  | 1.97  |
| West Siberian           | 10.51 (7.98, 12.97)  | 9.04 (5.54, 12.33)  | 1.16  | 0.24 (-0.00, 0.47)  | 0.23 (-0.12, 0.56)  | 1.04  |
| East Siberian           | 10.80 (8.02, 13.38)  | 10.82 (7.37, 14.26) | 1.00  | 0.38 (-0.10, 0.84)  | 0.27 (-0.11, 0.61)  | 1.41  |
| Far Eastern             | 12.69 (9.49, 15.86)  | 11.68 (7.79, 15.48) | 1.09  | 0.64 (0.13, 1.15)   | 0.55 (0.19, 0.88)   | 1.16  |
| <b>ages 0-59 years</b>  |                      |                     |       |                     |                     |       |
| All cities              | 10.52 (3.33, 16.42)  | 7.70 (4.39, 10.66)  | 1.37  | 0.19 (-0.35, 0.69)  | 0.37 (-0.01, 0.71)  | 0.51  |
| Northern                | 5.86 (-3.13, 12.88)  | 4.21 (1.26, 6.92)   | 1.39  | -0.74 (-4.10, 2.42) | -1.25 (-3.73, 0.87) | 0.59  |
| Northwestern            | 11.13 (4.14, 17.40)  | 8.45 (4.62, 12.23)  | 1.32  | 0.06 (-0.20, 0.32)  | 0.14 (-0.06, 0.32)  | 0.43  |
| Kaliningrad             | 7.37 (-0.23, 14.52)  | 8.23 (3.60, 12.84)  | 0.90  | 0.20 (-0.50, 0.86)  | 0.46 (0.00, 0.86)   | 0.43  |
| Central                 | 9.61 (6.52, 12.29)   | 9.11 (6.51, 11.40)  | 1.05  | 0.24 (-0.36, 0.81)  | 0.48 (0.13, 0.81)   | 0.50  |
| Central Black Earth     | 7.75 (3.49, 12.03)   | 6.99 (4.10, 9.82)   | 1.11  | 0.54 (-0.29, 1.33)  | 0.44 (0.10, 0.74)   | 1.23  |
| Volga                   | 9.48 (4.58, 14.07)   | 6.69 (3.20, 10.26)  | 1.42  | 0.48 (-0.24, 1.17)  | 0.60 (0.25, 0.91)   | 0.80  |
| Volga-Vyatka            | 8.57 (2.08, 14.44)   | 7.61 (4.76, 10.41)  | 1.13  | 0.13 (-0.35, 0.60)  | 0.43 (0.06, 0.77)   | 0.30  |
| North Caucasus          | 9.95 (4.50, 14.38)   | 7.91 (3.23, 12.36)  | 1.26  | 0.86 (-0.20, 1.87)  | 0.83 (0.21, 1.36)   | 1.04  |
| Ural                    | 13.52 (-0.77, 24.68) | 6.84 (2.89, 10.27)  | 1.98  | 0.03 (-0.20, 0.25)  | 0.22 (-0.16, 0.55)  | 0.14  |
| West Siberian           | 10.68 (-2.01, 20.96) | 7.42 (3.39, 11.31)  | 1.44  | 0.01 (-0.22, 0.24)  | 0.35 (-0.08, 0.73)  | 0.03  |
| East Siberian           | 14.48 (0.24, 25.52)  | 7.83 (2.91, 12.43)  | 1.85  | 0.01 (-0.40, 0.38)  | 0.32 (-0.23, 0.80)  | 0.03  |
| Far Eastern             | 11.08 (-2.03, 20.61) | 6.60 (0.96, 11.49)  | 1.68  | -0.18 (-1.12, 0.74) | 0.13 (-0.37, 0.59)  | 1.38  |
| <b>ages 60-74 years</b> |                      |                     |       |                     |                     |       |
| All cities              | 8.83 (4.49, 12.69)   | 11.15 (7.96, 13.78) | 0.79  | 0.50 (-0.08, 1.04)  | 0.45 (0.16, 0.71)   | 1.11  |
| Northern                | 11.23 (-1.54, 20.05) | 13.44 (6.82, 19.25) | 0.84  | 0.02 (-0.20, 0.22)  | 0.12 (-0.11, 0.32)  | 0.17  |
| Northwestern            | 4.47 (-0.13, 8.55)   | 12.45 (6.98, 17.29) | 0.36  | 0.04 (-0.41, 0.50)  | 0.08 (-0.09, 0.24)  | 0.50  |
| Kaliningrad             | 4.25 (-2.27, 9.93)   | 9.25 (1.57, 15.69)  | 0.46  | 0.46 (-0.38, 1.29)  | 0.30 (-0.18, 0.70)  | 1.53  |
| Central                 | 7.64 (2.97, 11.85)   | 10.68 (7.95, 13.10) | 0.72  | 0.52 (-0.10, 1.11)  | 0.41 (0.14, 0.67)   | 1.27  |

|                           |                     |                     |      |                    |                    |      |
|---------------------------|---------------------|---------------------|------|--------------------|--------------------|------|
| Central Black Earth       | 9.08 (4.27, 13.34)  | 9.25 (4.87, 13.05)  | 0.98 | 0.86 (0.19, 1.49)  | 0.60 (0.29, 0.87)  | 1.43 |
| Volga                     | 10.27 (5.68, 14.34) | 13.21 (9.58, 16.30) | 0.78 | 1.00 (0.28, 1.67)  | 0.90 (0.60, 1.17)  | 1.11 |
| Volga-Vyatka              | 8.82 (4.25, 12.90)  | 12.76 (8.17, 16.85) | 0.69 | 0.49 (-0.17, 1.11) | 0.52 (0.23, 0.78)  | 0.94 |
| North Caucasus            | 6.93 (1.21, 11.78)  | 5.18 (-1.00, 10.48) | 1.34 | 1.15 (0.29, 1.92)  | 1.03 (0.39, 1.59)  | 1.12 |
| Ural                      | 10.60 (3.69, 15.87) | 11.11 (8.38, 13.66) | 0.95 | 0.27 (-0.17, 0.68) | 0.24 (0.01, 0.45)  | 1.13 |
| West Siberian             | 10.18 (1.74, 16.39) | 11.22 (6.68, 15.32) | 0.91 | 0.04 (-0.27, 0.34) | 0.12 (-0.07, 0.29) | 0.33 |
| East Siberian             | 12.17 (7.59, 16.22) | 15.11 (8.90, 20.36) | 0.81 | 0.27 (-0.40, 0.90) | 0.33 (-0.06, 0.70) | 0.82 |
| Far Eastern               | 11.25 (6.06, 15.74) | 13.38 (8.25, 17.63) | 0.84 | 0.36 (-0.39, 1.02) | 0.39 (0.02, 0.73)  | 0.92 |
| <b>ages over 75 years</b> |                     |                     |      |                    |                    |      |
| All cities                | 11.73 (9.09, 14.31) | 12.21 (5.64, 17.89) | 0.96 | 1.09 (0.67, 1.47)  | 0.73 (0.20, 1.20)  | 1.49 |
| Northern                  | 14.45 (9.09, 19.48) | 14.42 (4.77, 22.17) | 1.00 | 0.24 (-0.03, 0.48) | 0.00 (-0.32, 0.31) | "--" |
| Northwestern              | 11.84 (9.44, 14.07) | 11.48 (4.91, 17.20) | 1.03 | 0.39 (0.09, 0.67)  | 0.15 (-0.22, 0.52) | 2.60 |
| Kaliningrad               | 12.21 (7.61, 16.44) | 12.07 (3.49, 19.09) | 1.01 | 0.42 (-0.19, 0.94) | 0.50 (-0.33, 1.27) | 0.84 |
| Central                   | 11.98 (8.85, 15.23) | 13.32 (5.60, 20.14) | 0.90 | 0.99 (0.45, 1.45)  | 0.65 (0.11, 1.15)  | 1.52 |
| Central Black Earth       | 11.29 (8.58, 14.18) | 13.95 (7.12, 20.11) | 0.81 | 1.35 (0.77, 1.89)  | 1.47 (0.86, 2.06)  | 0.92 |
| Volga                     | 11.62 (9.16, 13.92) | 13.21 (7.52, 18.29) | 0.88 | 2.02 (1.57, 2.45)  | 1.39 (1.00, 1.79)  | 1.45 |
| Volga-Vyatka              | 11.00 (8.35, 13.76) | 11.88 (4.85, 18.19) | 0.93 | 1.12 (0.61, 1.54)  | 0.69 (-0.03, 1.35) | 1.62 |
| North Caucasus            | 11.56 (7.77, 14.92) | 11.96 (3.08, 19.34) | 0.97 | 2.01 (1.36, 2.63)  | 1.56 (0.72, 2.33)  | 1.29 |
| Ural                      | 11.18 (8.09, 14.18) | 10.42 (4.91, 15.16) | 1.07 | 0.92 (0.51, 1.31)  | 0.32 (-0.03, 0.63) | 2.88 |
| West Siberian             | 11.21 (8.32, 14.03) | 10.03 (3.10, 16.08) | 1.12 | 0.52 (0.13, 0.90)  | 0.10 (-0.34, 0.51) | 5.20 |
| East Siberian             | 11.55 (6.99, 15.79) | 10.51 (3.13, 16.92) | 1.10 | 0.55 (-0.04, 1.12) | 0.17 (-0.45, 0.75) | 3.24 |
| Far Eastern               | 13.73 (9.24, 17.33) | 13.00 (3.87, 20.59) | 1.06 | 1.05 (0.51, 1.53)  | 1.15 (0.17, 2.10)  | 0.91 |

**Table S12:** Total mortality attributable fractions (AF) and attributable numbers (AN) of deaths to the heat and cold in 300 major Russian cities stratified by age and sex, 2000-19

| Age group                    | Cold                    |                         |                          | Heat                  |                       |                       |
|------------------------------|-------------------------|-------------------------|--------------------------|-----------------------|-----------------------|-----------------------|
|                              | Women (95%CI)           | Men (95%CI)             | Both (95%CI)             | Women (95%CI)         | Men (95%CI)           | Both (95%CI)          |
| <b>Attributable fraction</b> |                         |                         |                          |                       |                       |                       |
| <b>all ages</b>              | 10.63<br>(8.72, 12.62)  | 10.30<br>(7.26, 13.13)  | 10.47<br>(8.80, 11.99)   | 0.81<br>(0.67, 0.94)  | 0.51<br>(0.22, 0.78)  | 0.67<br>(0.42, 0.88)  |
| <b>0-59 years</b>            | 10.52<br>(3.33, 16.42)  | 7.70<br>(4.39, 10.66)   | 8.48<br>(6.70, 10.04)    | 0.19<br>(-0.35, 0.69) | 0.37<br>(-0.01, 0.71) | 0.33<br>(-0.04, 0.71) |
| <b>60-74 years</b>           | 8.83<br>(4.49, 12.69)   | 11.15<br>(7.96, 13.78)  | 10.16<br>(8.56, 11.67)   | 0.50<br>(-0.08, 1.04) | 0.45<br>(0.16, 0.71)  | 0.47<br>(0.19, 0.74)  |
| <b>over 75 years</b>         | 11.73<br>(9.09, 14.31)  | 12.21<br>(5.64, 17.89)  | 11.81<br>(8.20, 15.41)   | 1.09<br>(0.67, 1.47)  | 0.73<br>(0.20, 1.20)  | 0.99<br>(0.51, 1.46)  |
| <b>Attributable number</b>   |                         |                         |                          |                       |                       |                       |
| <b>all ages</b>              | 52256<br>(42865, 62024) | 47421<br>(33412, 60447) | 99631<br>(83731, 114145) | 3982<br>(3276, 4606)  | 2370<br>(1003, 3573)  | 6376<br>(4014, 8345)  |
| <b>0-59 years</b>            | 7648<br>(2421, 11938)   | 12581<br>(7184, 17422)  | 20022<br>(15820, 23721)  | 141<br>(-251, 498)    | 598<br>(-18, 1154)    | 791<br>(-104, 1680)   |
| <b>60-74 years</b>           | 11259<br>(5722, 16172)  | 19067<br>(13618, 23559) | 30322<br>(25548, 34840)  | 638<br>(-105, 1324)   | 773<br>(281, 1213)    | 1404<br>(558, 2205)   |
| <b>over 75 years</b>         | 34179<br>(26508, 41726) | 15363<br>(7098, 22509)  | 49296<br>(34232, 64317)  | 3185<br>(1948, 4297)  | 913<br>(252, 1503)    | 4125<br>(2134, 6082)  |

**Table S13:** Total mortality attributable fractions (AF) and attributable numbers (AN) of deaths to the heat and cold, including extreme cold and heat, in 300 major Russian cities stratified by regions, 2000-19

| Region                      |                     | Attributable fraction   |                             |                       |                             | Attributable number      |                      |                      |                      |
|-----------------------------|---------------------|-------------------------|-----------------------------|-----------------------|-----------------------------|--------------------------|----------------------|----------------------|----------------------|
|                             |                     | Cold, %<br>(95% CI)     | Extreme cold, %<br>(95% CI) | Heat, %<br>(95% CI)   | Extreme heat, %<br>(95% CI) | Cold, deaths             | Extreme cold, deaths | Heat, deaths         | Extreme heat, deaths |
| All cities                  |                     | 10.47<br>(8.80, 11.99)  | 0.65<br>(0.51, 0.78)        | 0.67<br>(0.42, 0.88)  | 0.40<br>(0.25, 0.52)        | 99631<br>(83731, 114145) | 6226<br>(4871, 7408) | 6376<br>(4014, 8345) | 3793<br>(2414, 4940) |
| The European part of Russia | Northern            | 14.01<br>(10.54, 17.50) | 0.80<br>(0.62, 0.96)        | 0.08<br>(-0.08, 0.22) | 0.07<br>(-0.03, 0.15)       | 3526<br>(2653, 4407)     | 201<br>(156, 242)    | 21<br>(-19, 55)      | 18<br>(-8, 39)       |
|                             | Northwestern        | 9.84<br>(7.55, 11.96)   | 0.75<br>(0.61, 0.86)        | 0.18<br>(-0.00, 0.35) | 0.15<br>(0.01, 0.27)        | 7440<br>(5711, 9038)     | 565<br>(465, 652)    | 140<br>(-0, 265)     | 112<br>(9, 204)      |
|                             | Kaliningrad         | 8.03<br>(4.99, 10.80)   | 0.65<br>(0.47, 0.81)        | 0.28<br>(-0.13, 0.62) | 0.20<br>(-0.06, 0.41)       | 433<br>(269, 583)        | 35<br>(25, 44)       | 15<br>(-7, 33)       | 11<br>(-3, 22)       |
|                             | Central             | 10.78<br>(9.11, 12.24)  | 0.60<br>(0.45, 0.74)        | 0.66<br>(0.49, 0.80)  | 0.45<br>(0.33, 0.53)        | 28558<br>(24148, 32422)  | 1594<br>(1188, 1951) | 1757<br>(1294, 2112) | 1186<br>(879, 1413)  |
|                             | Central Black Earth | 10.35<br>(7.76, 12.54)  | 0.69<br>(0.54, 0.83)        | 1.02<br>(0.69, 1.30)  | 0.63<br>(0.43, 0.80)        | 4200<br>(3151, 5089)     | 280<br>(218, 337)    | 414<br>(282, 526)    | 255<br>(176, 323)    |
|                             | Volga               | 10.82<br>(9.25, 12.35)  | 0.70<br>(0.55, 0.83)        | 1.24<br>(0.97, 1.46)  | 0.68<br>(0.53, 0.81)        | 12353<br>(10556, 14101)  | 799<br>(625, 949)    | 1411<br>(1110, 1666) | 776 (607, 919)       |
|                             | Volga-Vyatka        | 10.51<br>(8.31, 12.53)  | 0.61<br>(0.47, 0.72)        | 0.75<br>(0.41, 1.04)  | 0.48<br>(0.27, 0.65)        | 4817<br>(3812, 5746)     | 278<br>(216, 332)    | 344<br>(189, 477)    | 220<br>(126, 299)    |
|                             | North Caucasus      | 9.25<br>(7.27, 10.91)   | 0.75<br>(0.60, 0.87)        | 1.36<br>(1.05, 1.60)  | 0.69<br>(0.53, 0.82)        | 8036<br>(6317, 9476)     | 647<br>(524, 753)    | 1177<br>(915, 1390)  | 598<br>(457, 711)    |
| Ural                        | Ural                | 10.13<br>(8.82, 11.42)  | 0.66<br>(0.55, 0.76)        | 0.43<br>(0.20, 0.62)  | 0.24<br>(0.11, 0.35)        | 12919<br>(11248, 14563)  | 843<br>(701, 973)    | 547<br>(256, 791)    | 309<br>(142, 442)    |
| Siberia                     | West Siberian       | 9.73<br>(7.91, 11.56)   | 0.58<br>(0.46, 0.68)        | 0.24<br>(-0.05, 0.49) | 0.14<br>(-0.02, 0.28)       | 8746<br>(7112, 10391)    | 518<br>(411, 611)    | 216<br>(-44, 443)    | 127<br>(-17, 247)    |
|                             | East Siberian       | 10.42<br>(8.13, 12.60)  | 0.54<br>(0.35, 0.70)        | 0.33<br>(-0.04, 0.66) | 0.19<br>(-0.01, 0.36)       | 4546<br>(3546, 5495)     | 237<br>(155, 304)    | 143<br>(-18, 288)    | 83<br>(-4, 158)      |

|              |             |                         |                      |                      |                      |                      |                   |                  |                  |
|--------------|-------------|-------------------------|----------------------|----------------------|----------------------|----------------------|-------------------|------------------|------------------|
| The Far East | Far Eastern | 12.52<br>(10.15, 14.85) | 0.70<br>(0.46, 0.92) | 0.59<br>(0.26, 0.88) | 0.31<br>(0.14, 0.45) | 4056<br>(3288, 4811) | 228<br>(149, 298) | 191<br>(83, 285) | 100<br>(46, 145) |
|--------------|-------------|-------------------------|----------------------|----------------------|----------------------|----------------------|-------------------|------------------|------------------|

*Note: extreme cold and heat defined as temperatures lower than 2.5<sup>th</sup> location-specific percentile (extreme cold) and higher than 97.5<sup>th</sup> location-specific percentiles (extreme heat)*



**Table S14:** Temperature-mortality associations according to the heat and cold exposure in most populated cities of the regions in 2000-2019, including minimum mortality temperature (MMT), relative risks (RRs) to cold and heat, attributable fractions (AF) and attributable numbers (AN) of deaths to the heat and cold, including extreme cold and heat

| Region       | Temperature-mortality associations                                                                           | MMT<br>(95% eCI)        | RRs cold<br>(95% CI) | RRs heat<br>(95% CI) | AF (%) / AN<br>(deaths) cold<br>(95% eCI) | AF (%) / AN<br>(deaths) heat<br>(95% eCI) |
|--------------|--------------------------------------------------------------------------------------------------------------|-------------------------|----------------------|----------------------|-------------------------------------------|-------------------------------------------|
| Northern     | <p><b>Arkhangelsk</b></p> 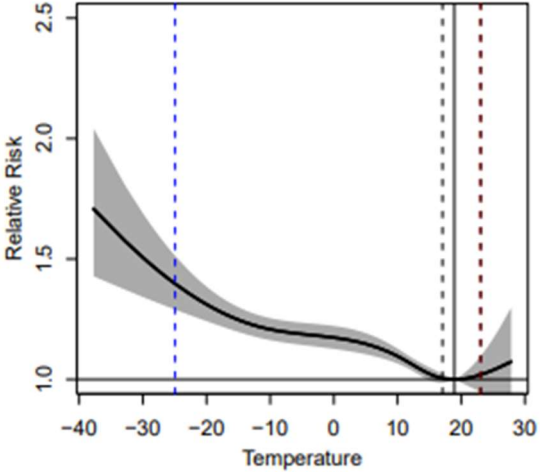 | 18.92<br>(17.07, 23.05) | 1.38<br>(1.29, 1.51) | 1.02<br>(0.95, 1.10) | AF total:<br>12.21<br>(9.80, 14.72)       | AF total:<br>0.05<br>(-0.17, 0.24)        |
|              |                                                                                                              |                         |                      |                      | AF Extreme:<br>0.78<br>(0.62, 0.92)       | AF Extreme:<br>0.05<br>(-0.14, 0.21)      |
|              |                                                                                                              |                         |                      |                      | AN total:<br>473<br>(380, 571)            | AN total:<br>2<br>(-7, 9)                 |
|              |                                                                                                              |                         |                      |                      | AN Extreme:<br>30<br>(24, 36)             | AN Extreme:<br>2 (-6, 8)                  |
| Northwestern |                                                                                                              | 18.14<br>(17.35, 20.08) | 1.38<br>(1.30, 1.46) | 1.06<br>(1.01, 1.12) | AF total:<br>9.82<br>(7.63, 11.85)        | AF total:<br>0.17<br>(0.00, 0.32)         |
|              |                                                                                                              |                         |                      |                      | AF Extreme:<br>0.76<br>(0.63, 0.87):      | AF Extreme:<br>0.14<br>(0.02, 0.25)       |

|             |                                                                                                              |                         |                      |                      |                                            |                                             |
|-------------|--------------------------------------------------------------------------------------------------------------|-------------------------|----------------------|----------------------|--------------------------------------------|---------------------------------------------|
|             | <b>Saint Petersburg</b><br>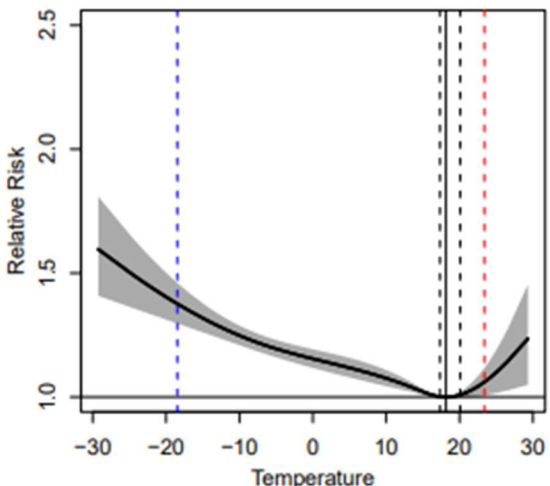 |                         |                      |                      | <i>AN total:</i><br>5961<br>(4631, 7193)   | <i>AN total:</i><br>103<br>(1, 193)         |
|             |                                                                                                              |                         |                      |                      | <i>AN Extreme:</i><br>461<br>(381, 531)    | <i>AN Extreme:</i><br>84<br>(10, 150)       |
| Kaliningrad | <b>Kaliningrad</b><br>     | 18.79<br>(17.86, 23.72) | 1.31<br>(1.21, 1.41) | 1.09<br>(0.98, 1.21) | <i>AF total:</i><br>8.03<br>(4.99, 10.80)  | <i>AF total:</i><br>0.28<br>(-0.13, 0.62)   |
|             |                                                                                                              |                         |                      |                      | <i>AF Extreme:</i><br>0.65<br>(0.47, 0.81) | <i>AF Extreme:</i><br>0.20<br>(-0.06, 0.41) |
|             |                                                                                                              |                         |                      |                      | <i>AN total:</i><br>433<br>(269, 583)      | <i>AN total:</i><br>15<br>(-7, 33)          |
|             |                                                                                                              |                         |                      |                      | <i>AN Extreme:</i><br>35<br>(25, 44)       | <i>AN Extreme:</i><br>11<br>(-3, 22)        |

|                        |                                                                                                           |                         |                      |                      |                                             |                                            |
|------------------------|-----------------------------------------------------------------------------------------------------------|-------------------------|----------------------|----------------------|---------------------------------------------|--------------------------------------------|
| Central                | <p><b>Moscow</b></p> 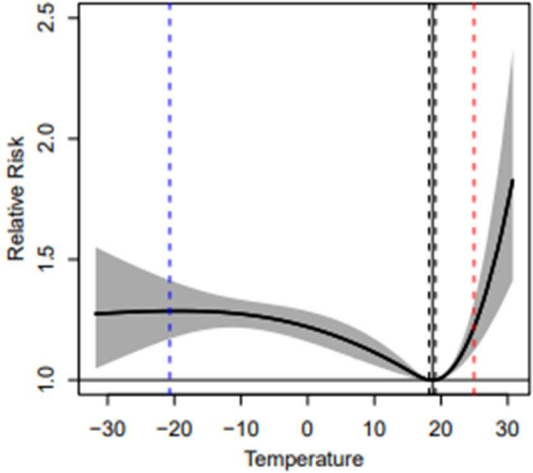    | 18.72<br>(18.20, 19.19) | 1.29<br>(1.17, 1.41) | 1.22<br>(1.12, 1.32) | <i>AF total:</i><br>12.16<br>(8.82, 14.89)  | <i>AF total:</i><br>0.80<br>(0.46, 1.08)   |
|                        |                                                                                                           |                         |                      |                      | <i>AF Extreme:</i><br>0.60<br>(0.38, 0.79)  | <i>AF Extreme:</i><br>0.55<br>(0.32, 0.73) |
|                        |                                                                                                           |                         |                      |                      | <i>AN total:</i><br>13949<br>(10119, 17076) | <i>AN total:</i><br>922<br>(530, 1244)     |
|                        |                                                                                                           |                         |                      |                      | <i>AN Extreme:</i><br>690<br>(433, 911)     | <i>AN Extreme:</i><br>629<br>(372, 841)    |
| Central Black<br>Earth | <p><b>Voronezh</b></p>  | 20.54<br>(20.19, 20.75) | 1.37<br>(1.29, 1.46) | 1.31<br>(1.21, 1.40) | <i>AF total:</i><br>10.36<br>(8.26, 12.25)  | <i>AF total:</i><br>1.13<br>(0.84, 1.38)   |
|                        |                                                                                                           |                         |                      |                      | <i>AF Extreme:</i><br>0.74<br>(0.60, 0.87)  | <i>AF Extreme:</i><br>0.69<br>(0.52, 0.84) |
|                        |                                                                                                           |                         |                      |                      | <i>AN total:</i><br>1238<br>(986, 1463)     | <i>AN total:</i><br>135<br>(101, 165)      |
|                        |                                                                                                           |                         |                      |                      | <i>AN Extreme:</i><br>88<br>(72, 104)       | <i>AN Extreme:</i><br>82<br>(62, 100)      |

|              |                                                                                                                  |                         |                      |                      |                                            |                                            |
|--------------|------------------------------------------------------------------------------------------------------------------|-------------------------|----------------------|----------------------|--------------------------------------------|--------------------------------------------|
| Volga        | <p><b>Samara</b></p> 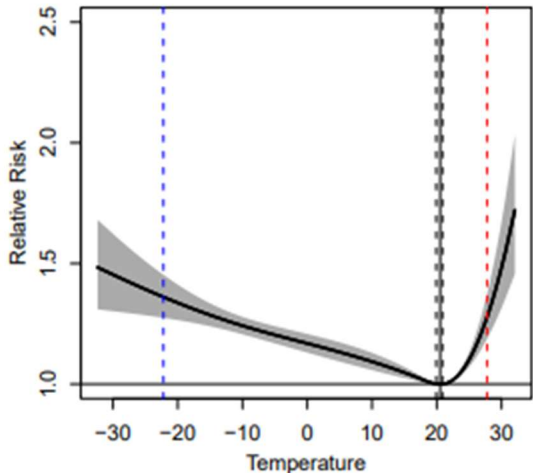           | 20.54<br>(19.92, 20.87) | 1.36<br>(1.27, 1.45) | 1.28<br>(1.19, 1.37) | <i>AF total:</i><br>10.25<br>(8.18, 12.04) | <i>AF total:</i><br>1.06<br>(0.76, 1.31)   |
|              |                                                                                                                  |                         |                      |                      | <i>AF Extreme:</i><br>0.70<br>(0.56, 0.82) | <i>AF Extreme:</i><br>0.61<br>(0.44, 0.76) |
|              |                                                                                                                  |                         |                      |                      | <i>AN total:</i><br>1578<br>(1259, 1854)   | <i>AN total:</i><br>162<br>(117, 202)      |
|              |                                                                                                                  |                         |                      |                      | <i>AN Extreme:</i><br>108<br>(86, 127)     | <i>AN Extreme:</i><br>94<br>(68, 117)      |
| Volga-Vyatka | <p><b>Nizhny Novgorod</b></p>  | 19.11<br>(18.67, 19.28) | 1.30<br>(1.23, 1.38) | 1.21<br>(1.14, 1.29) | <i>AF total:</i><br>11.03<br>(9.20, 12.79) | <i>AF total:</i><br>0.81<br>(0.56, 1.05)   |
|              |                                                                                                                  |                         |                      |                      | <i>AF Extreme:</i><br>0.63<br>(0.49, 0.75) | <i>AF Extreme:</i><br>0.53<br>(0.38, 0.67) |
|              |                                                                                                                  |                         |                      |                      | <i>AN total:</i><br>1974<br>(1646, 2288)   | <i>AN total:</i><br>146<br>(101, 187)      |
|              |                                                                                                                  |                         |                      |                      | <i>AN Extreme:</i><br>113<br>(89, 135)     | <i>AN Extreme:</i><br>5<br>(-0, 10)        |

|                   |                                                                                                            |                         |                      |                      |                                            |                                             |
|-------------------|------------------------------------------------------------------------------------------------------------|-------------------------|----------------------|----------------------|--------------------------------------------|---------------------------------------------|
| North<br>Caucasus | <b>Rostov-on-Don</b><br>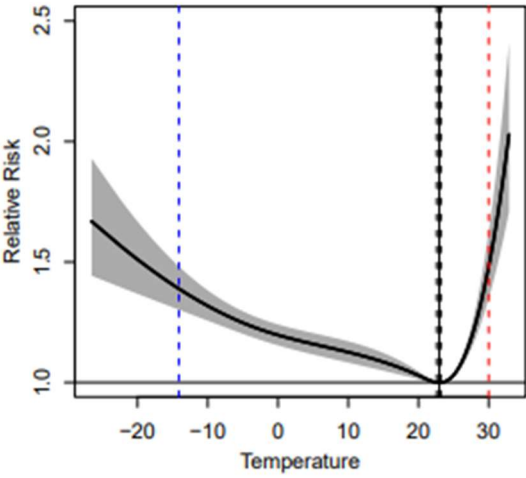  | 22.97<br>(22.59, 23.19) | 1.39<br>(1.30, 1.48) | 1.48<br>(1.35, 1.62) | <i>AF total:</i><br>10.05<br>(7.72, 12.12) | <i>AF total:</i><br>1.63<br>(1.28, 1.92)    |
|                   |                                                                                                            |                         |                      |                      | <i>AF Extreme:</i><br>0.79<br>(0.65, 0.92) | <i>AF Extreme:</i><br>0.84<br>(0.67, 0.99)  |
|                   |                                                                                                            |                         |                      |                      | <i>AN total:</i><br>1280<br>(984, 1544)    | <i>AN total:</i><br>208<br>(163, 245)       |
|                   |                                                                                                            |                         |                      |                      | <i>AN Extreme:</i><br>101<br>(83, 117)     | <i>AN Extreme:</i><br>108<br>(85, 127)      |
| Ural              | <b>Yekaterinburg</b><br> | 18.23<br>(17.70, 23.69) | 1.29<br>(1.21, 1.37) | 1.06<br>(0.99, 1.13) | <i>AF total:</i><br>10.03<br>(8.19, 11.76) | <i>AF total:</i><br>0.21<br>(-0.09, 0.47)   |
|                   |                                                                                                            |                         |                      |                      | <i>AF Extreme:</i><br>0.60<br>(0.45, 0.72) | <i>AF Extreme:</i><br>0.14<br>(-0.03, 0.28) |
|                   |                                                                                                            |                         |                      |                      | <i>AN total:</i><br>1455<br>(1187, 1706)   | <i>AN total:</i><br>30<br>(-13, 68)         |
|                   |                                                                                                            |                         |                      |                      | <i>AN Extreme:</i><br>86<br>(66, 105)      | <i>AN Extreme:</i><br>20<br>(-5, 41)        |

|               |                           |                         |                      |                      |                                            |                                             |
|---------------|---------------------------|-------------------------|----------------------|----------------------|--------------------------------------------|---------------------------------------------|
| West Siberian | <p><b>Novosibirsk</b></p> | 18.50<br>(17.67, 23.76) | 1.27<br>(1.19, 1.36) | 1.06<br>(0.99, 1.14) | <i>AF total:</i><br>9.36<br>(7.26, 11.33)  | <i>AF total:</i><br>0.24<br>(-0.08, 0.53)   |
|               |                           |                         |                      |                      | <i>AF Extreme:</i><br>0.56<br>(0.41, 0.69) | <i>AF Extreme:</i><br>0.14<br>(-0.03, 0.29) |
|               |                           |                         |                      |                      | <i>AN total:</i><br>1572<br>(1220, 1904)   | <i>AN total:</i><br>40<br>(-13, 89)         |
|               |                           |                         |                      |                      | <i>AN Extreme:</i><br>94<br>(69, 116)      | <i>AN Extreme:</i><br>24<br>(-4, 49)        |
| East Siberian | <p><b>Krasnoyarsk</b></p> | 17.90<br>(17.09, 23.56) | 1.28<br>(1.18, 1.38) | 1.07<br>(0.99, 1.16) | <i>AF total:</i><br>9.26<br>(6.90, 11.45)  | <i>AF total:</i><br>0.29<br>(-0.06, 0.61)   |
|               |                           |                         |                      |                      | <i>AF Extreme:</i><br>0.57<br>(0.39, 0.71) | <i>AF Extreme:</i><br>0.17<br>(-0.02, 0.35) |
|               |                           |                         |                      |                      | <i>AN total:</i><br>893<br>(666, 1104)     | <i>AN total:</i><br>28<br>(-6, 59)          |
|               |                           |                         |                      |                      | <i>AN Extreme:</i><br>55<br>(38, 69)       | <i>AN Extreme:</i><br>17<br>(-2, 33)        |

|             |                        |                         |                      |                      |                                     |                                     |
|-------------|------------------------|-------------------------|----------------------|----------------------|-------------------------------------|-------------------------------------|
| Far Eastern | <b>Vladivostok</b><br> | 18.61<br>(18.27, 19.17) | 1.31<br>(1.21, 1.43) | 1.17<br>(1.07, 1.27) | AF total:<br>10.76<br>(8.54, 12.77) | AF total:<br>0.67<br>(0.28, 1.01)   |
|             |                        |                         |                      |                      | AF Extreme:<br>0.65<br>(0.45, 0.81) | AF Extreme:<br>0.35<br>(0.16, 0.52) |
|             |                        |                         |                      |                      | AN total:<br>673<br>(534, 799)      | AN total:<br>42<br>(17, 63)         |
|             |                        |                         |                      |                      | AN Extreme:<br>40<br>(28, 51)       | AN Extreme:<br>22<br>(10, 32)       |

*Note: extreme cold and heat defined as temperatures lower than 2.5<sup>th</sup> location-specific percentile (extreme cold) and higher than 97.5<sup>th</sup> location-specific percentiles (extreme heat). Dashed vertical lines denote the 1<sup>st</sup> (blue) and 99<sup>th</sup> (red) percentiles of the temperature distributions. Solid vertical lines denote minimum mortality temperature (MMT) and dashed vertical lines denote 95% eCI of MMT. Shaded areas denote 95% confidence interval of relative risks (RRs)*



**Table S15:** Total mortality attributable fractions (AF) and attributable numbers (AN) of deaths to the cold, including extreme cold, in ten cities with the highest values of cold-related RRs (first percentile of temperature), 2000-19

| Region         | City                     | RRs cold<br>(95% CI) | AF (%) cold<br>(95% eCI) | AN (deaths) cold<br>(95% eCI) | AF (%) extreme cold<br>(95% eCI) | AN (deaths) extreme cold<br>(95% eCI) |
|----------------|--------------------------|----------------------|--------------------------|-------------------------------|----------------------------------|---------------------------------------|
| Northern       | Vorkuta                  | 1.70<br>(1.40, 2.06) | 31.11<br>(20.26, 40.62)  | 262<br>(171, 342)             | 1.12<br>(0.80, 1.39)             | 9<br>(7, 12)                          |
| Northern       | Murmansk                 | 1.57<br>(1.39, 1.77) | 22.27<br>(16.40, 27.96)  | 767<br>(565, 963)             | 1.00<br>(0.79, 1.19)             | 35<br>(27, 41)                        |
| Far Eastern    | Petropavlovsk-Kamchatsky | 1.56<br>(1.36, 1.78) | 20.94<br>(13.36, 28.32)  | 371<br>(237, 502)             | 0.95<br>(0.71, 1.15)             | 17<br>(13, 20)                        |
| Far Eastern    | Magadan                  | 1.54<br>(1.35, 1.75) | 22.08<br>(16.84, 26.93)  | 253<br>(193, 309)             | 0.93<br>(0.70, 1.13)             | 11<br>(8, 13)                         |
| North Caucasus | Kamensk-Shakhtinsky      | 1.47<br>(1.35, 1.61) | 9.46<br>(6.43, 12.05)    | 129<br>(87, 164)              | 0.93<br>(0.74, 1.10)             | 13<br>(10, 15)                        |
| North Caucasus | Gukovo                   | 1.46<br>(1.33, 1.60) | 9.58<br>(6.25, 12.42)    | 101<br>(66, 131)              | 0.87<br>(0.68, 1.03)             | 9<br>(7, 11)                          |
| Far Eastern    | Artyom                   | 1.46<br>(1.32, 1.62) | 11.81<br>(9.06, 14.15)   | 166<br>(127, 199)             | 0.94<br>(0.70, 1.14)             | 13<br>(10, 16)                        |
| North Caucasus | Yeysk                    | 1.46<br>(1.33, 1.59) | 9.64<br>(6.80, 12.10)    | 179<br>(126, 225)             | 0.86<br>(0.67, 1.01)             | 16<br>(12, 19)                        |
| Ural           | Berezniki                | 1.45<br>(1.28, 1.64) | 17.27<br>(8.78, 25.66)   | 381<br>(193, 566)             | 0.79<br>(0.59, 0.99)             | 17<br>(13, 22)                        |

**Table S16:** Total mortality attributable fractions (AF) and attributable numbers (AN) of deaths to the heat, including extreme heat, in ten cities with the highest values of heat-related RRs (99<sup>th</sup> percentile of temperature), 2000-19

| Region         | City       | RRs heat<br>(95% CI) | AF (%) heat<br>(95% eCI) | AN (deaths) heat<br>(95% eCI) | AF (%) extreme heat<br>(95% eCI) | AN (deaths) extreme cold<br>(95% eCI) |
|----------------|------------|----------------------|--------------------------|-------------------------------|----------------------------------|---------------------------------------|
| Volga          | Volzhsky   | 1.66<br>(1.49, 1.85) | 2.38<br>(1.96, 2.72)     | 81<br>(66, 92)                | 1.17<br>(0.96, 1.34)             | 40<br>(33, 45)                        |
| Volga          | Elista     | 1.64<br>(1.46, 1.84) | 2.18<br>(1.80, 2.57)     | 19<br>(16, 23)                | 1.02<br>(0.83, 1.21)             | 9<br>(7, 11)                          |
| Volga          | Astrakhan  | 1.63<br>(1.49, 1.78) | 2.25<br>(1.94, 2.57)     | 136<br>(118, 156)             | 0.93<br>(0.80, 1.07)             | 57<br>(49, 65)                        |
| Volga          | Volgograd  | 1.57<br>(1.45, 1.70) | 2.03<br>(1.71, 2.30)     | 259<br>(219, 294)             | 1.02<br>(0.88, 1.16)             | 131<br>(112, 148)                     |
| Volga          | Kamyshin   | 1.53<br>(1.35, 1.73) | 1.97<br>(1.47, 2.39)     | 30<br>(23, 37)                | 1.03<br>(0.77, 1.24)             | 16<br>(12, 19)                        |
| North Caucasus | Volgodonsk | 1.52<br>(1.33, 1.74) | 2.06<br>(1.50, 2.52)     | 33<br>(24, 41)                | 0.97<br>(0.70, 1.19)             | 16<br>(11, 19)                        |
| North Caucasus | Anapa      | 1.51<br>(1.31, 1.73) | 1.97<br>(1.39, 2.45)     | 15<br>(11, 19)                | 0.98<br>(0.68, 1.22)             | 8<br>(5, 9)                           |
| North Caucasus | Derbent    | 1.49<br>(1.32, 1.69) | 1.96<br>(1.45, 2.48)     | 11<br>(8, 14)                 | 0.89<br>(0.65, 1.11)             | 5<br>(4, 7)                           |
| North Caucasus | Yeysk      | 1.49<br>(1.31, 1.68) | 1.89<br>(1.36, 2.32)     | 35<br>(25, 43)                | 0.86<br>(0.61, 1.06)             | 16<br>(11, 20)                        |
| North Caucasus | Bataysk    | 1.48<br>(1.30, 1.69) | 1.60<br>(1.14, 1.98)     | 22<br>(16, 28)                | 0.81<br>(0.57, 1.00)             | 11<br>(8, 14)                         |
